# Supplementary material
Source: PubMed Central journal article supplement (PMC4382426)

# CHEMISTRY

## A **European** Journal

### Supporting Information

#### **Synthesis of 3,8-Dichloro-6-ethyl-1,2,5,7-tetramethyl-BODIPY from an Asymmetric Dipyrroketone and Reactivity Studies at the 3,5,8-Positions\*\***

Ning Zhao, M. Graça H. Vicente,\* Frank R. Fronczek, and Kevin M. Smith<sup>[a]</sup>

chem\_201406550\_sm\_miscellaneous\_information.pdf

## Supplementary Data

### Synthesis of 3,8-dichloro-6-ethyl-1,2,5,7-tetramethyl-BODIPY from an Asymmetric Dipyrrone, and Reactivity Studies at the 3,5,8-positions

Ning Zhao, M. Graça H. Vicente\*<sup>1a</sup>, Frank R. Fronczek and Kevin M. Smith  
Department of Chemistry, Louisiana State University, Baton Rouge, LA 70803, USA

## Table of Contents

|                                                         |    |
|---------------------------------------------------------|----|
| Normalized Absorbance and Emission Spectra.....         | 2  |
| <sup>1</sup> H NMR and <sup>13</sup> C NMR spectra..... | 4  |
| 11B NMR spectra.....                                    | 26 |

## 1. Normalized absorbance and normalized fluorescence spectra

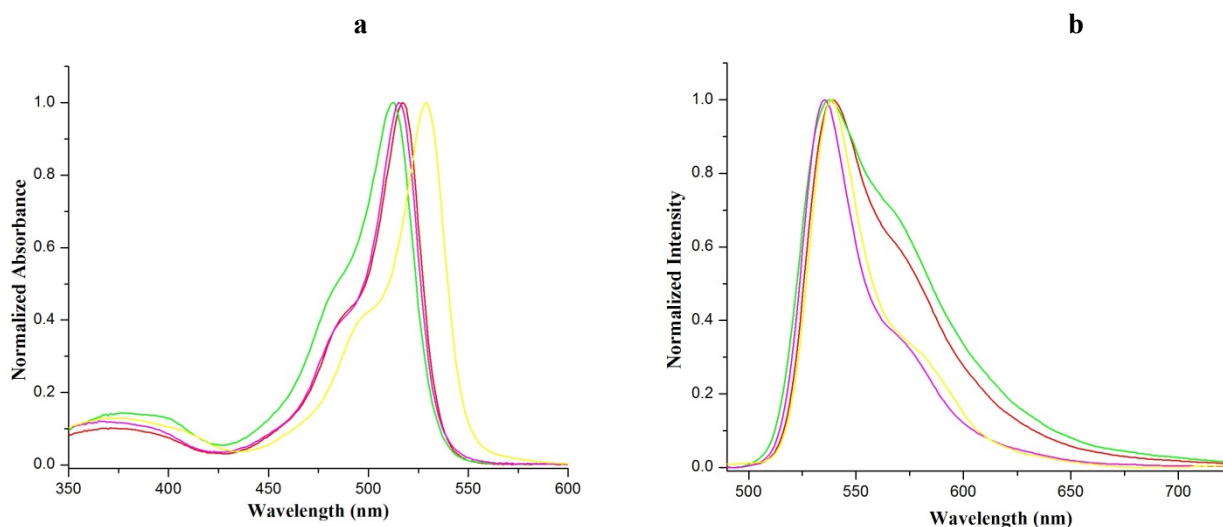

**Figure S1:** Normalized UV-Vis (a) and fluorescence (b) spectra of BODIPY **1a** (red), **1b** (green), **7a** (yellow), and **7c** (magenta) in dichloromethane at room temperature.

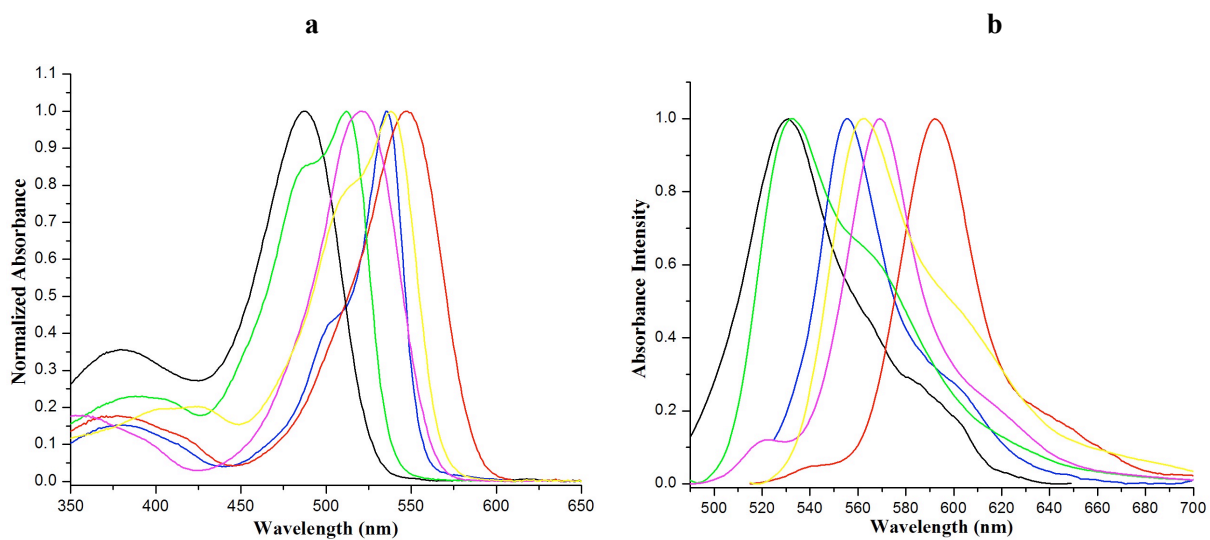

**Figure S2:** Normalized UV-Vis (a) and fluorescence (b) spectra of BODIPY **6a** (red), **7b** (blue), **12** (black), **14** (green), **15** (magenta) and **17** (yellow) in dichloromethane at room temperature.

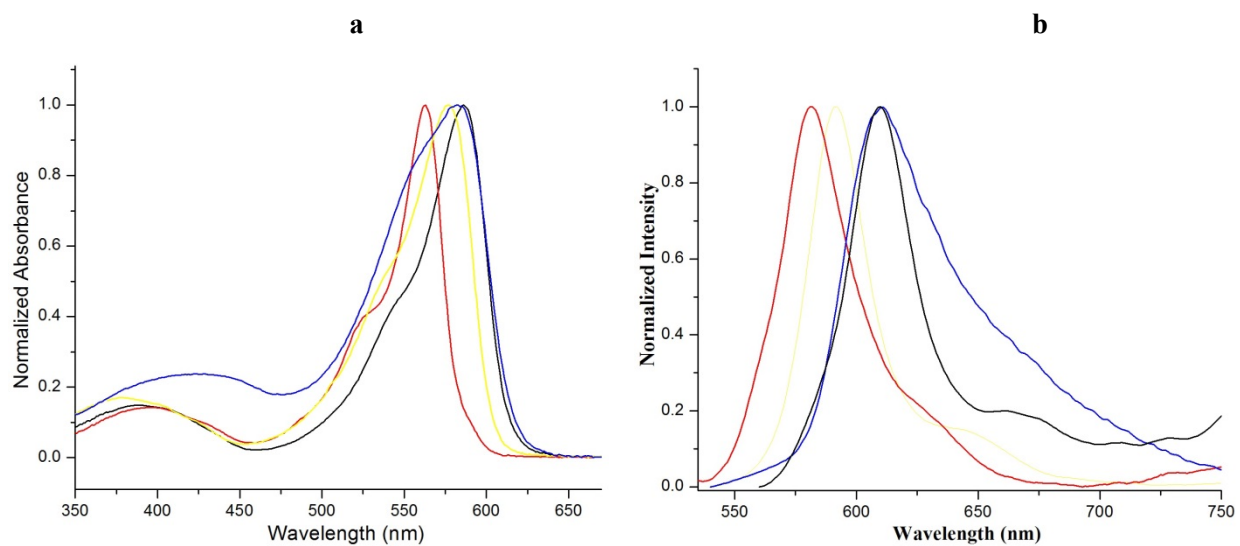

**Figure S3:** Normalized UV-Vis (a) and fluorescence (b) spectra of BODIPY **6b** (black), **8** (yellow), **10** (red), and **13** (Blue) in dichloromethane at room temperature.

## Copies of $^1\text{H}$ NMR and $^{13}\text{C}$ NMR spectra

### $^1\text{H}$ NMR spectra of pyrrole **2b**

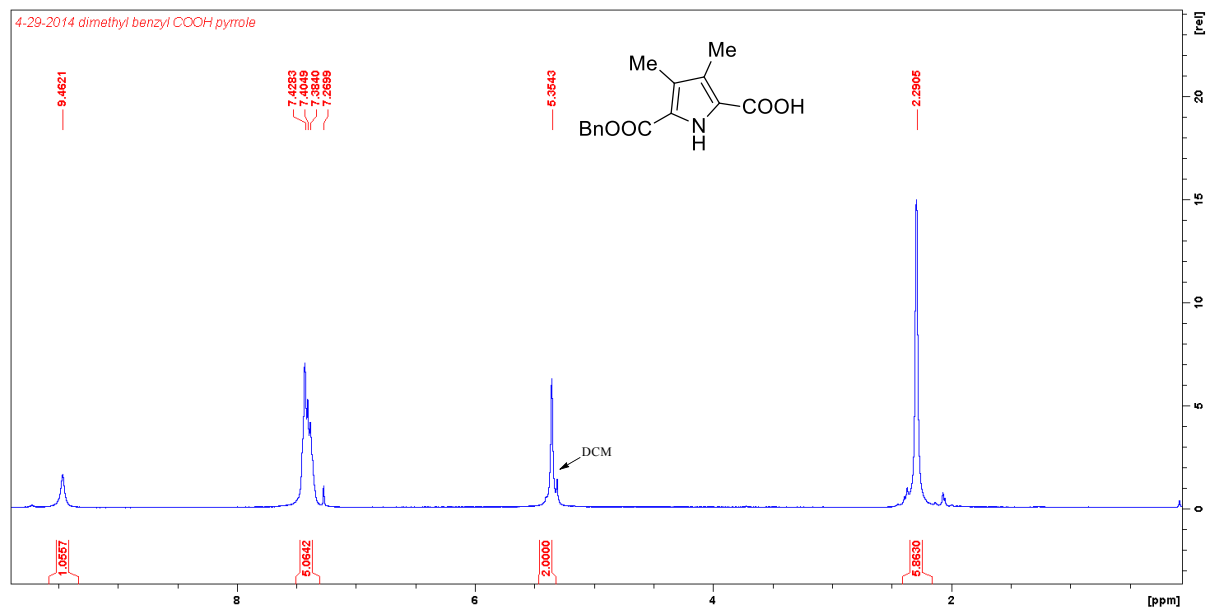

### $^{13}\text{C}$ NMR spectra of pyrrole **2b**

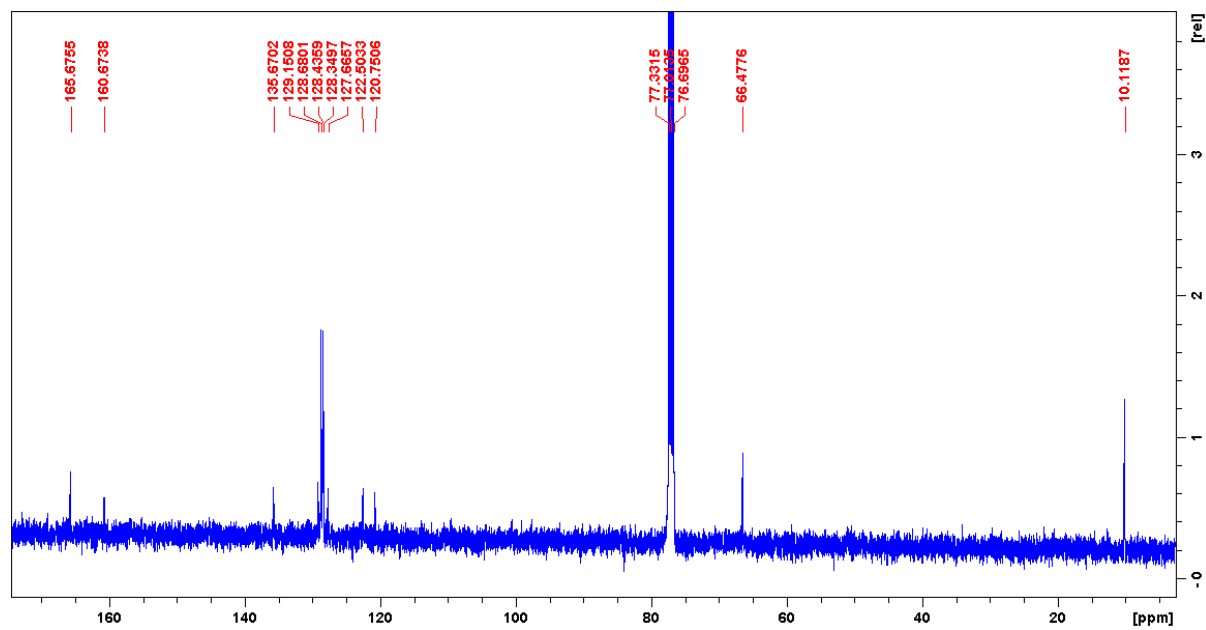

### <sup>1</sup>H NMR spectra of pyrrole 2c

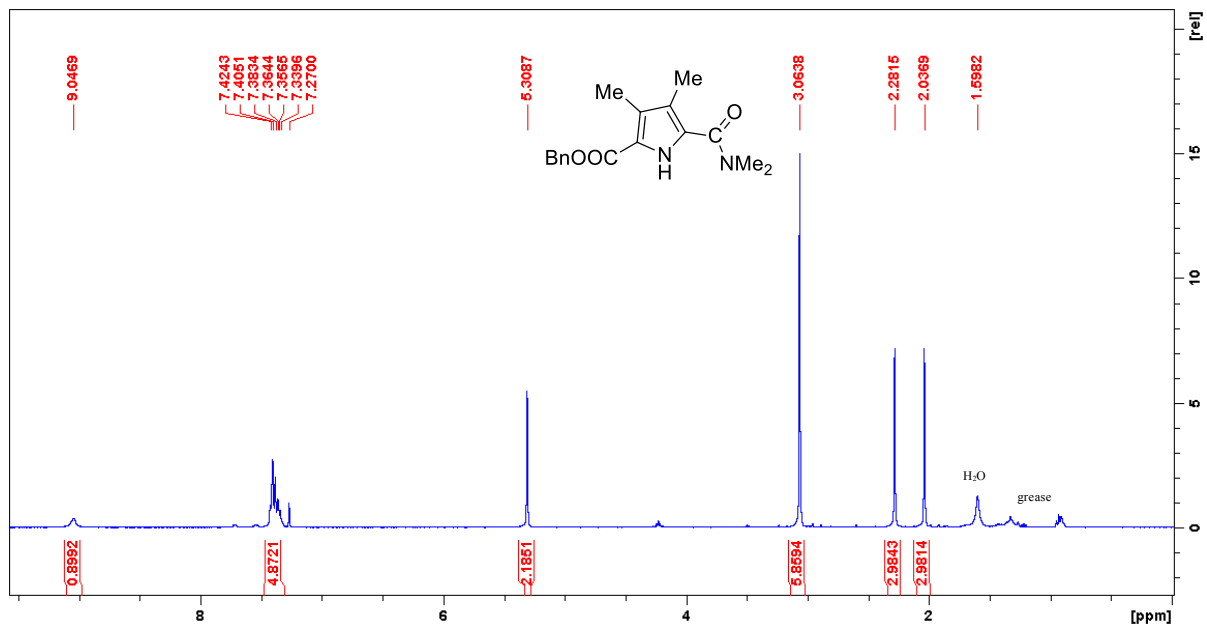

### <sup>13</sup>C NMR spectra of pyrrole 2c

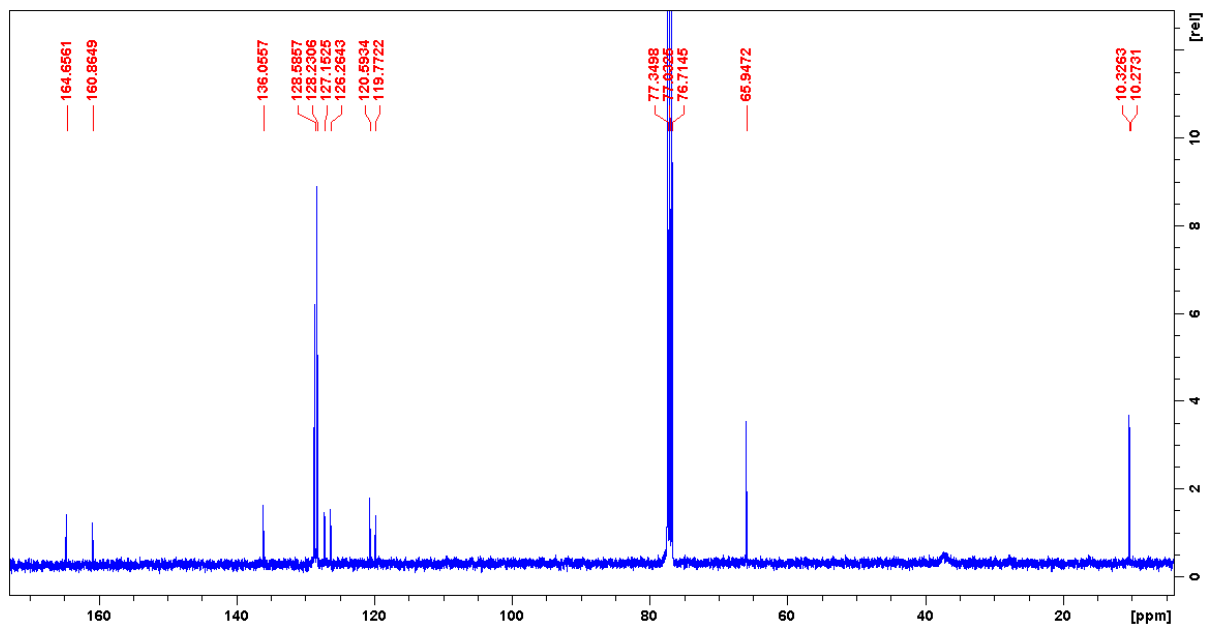

### <sup>1</sup>H NMR spectra of dipyrroketone **3**

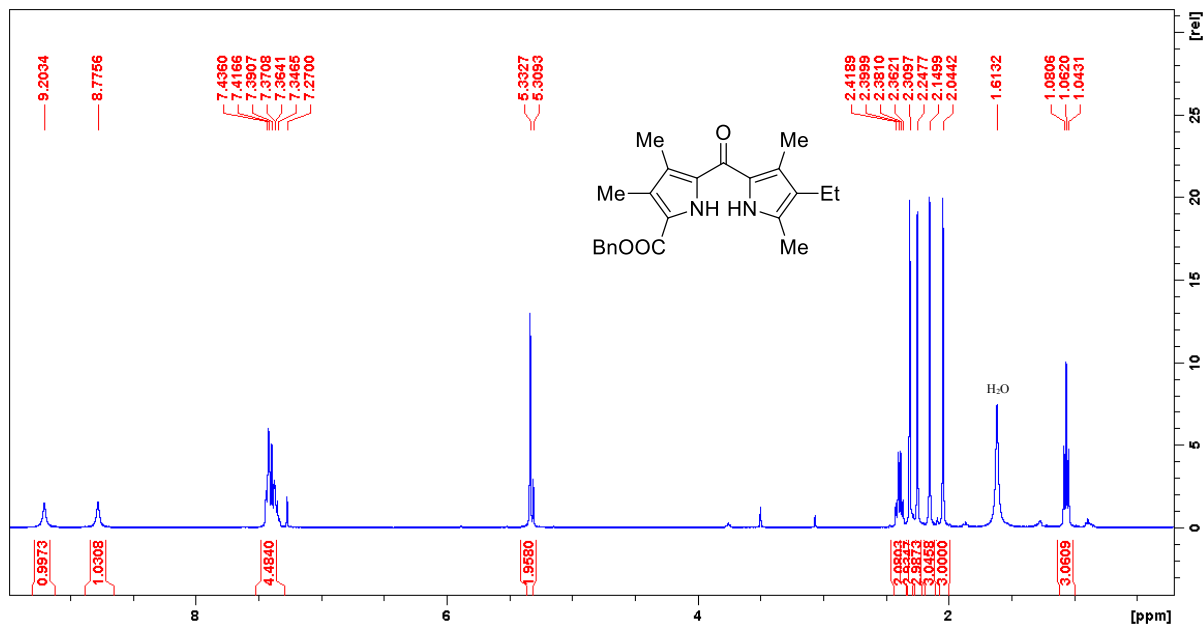

### <sup>13</sup>C NMR spectra of dipyrroketone **3**

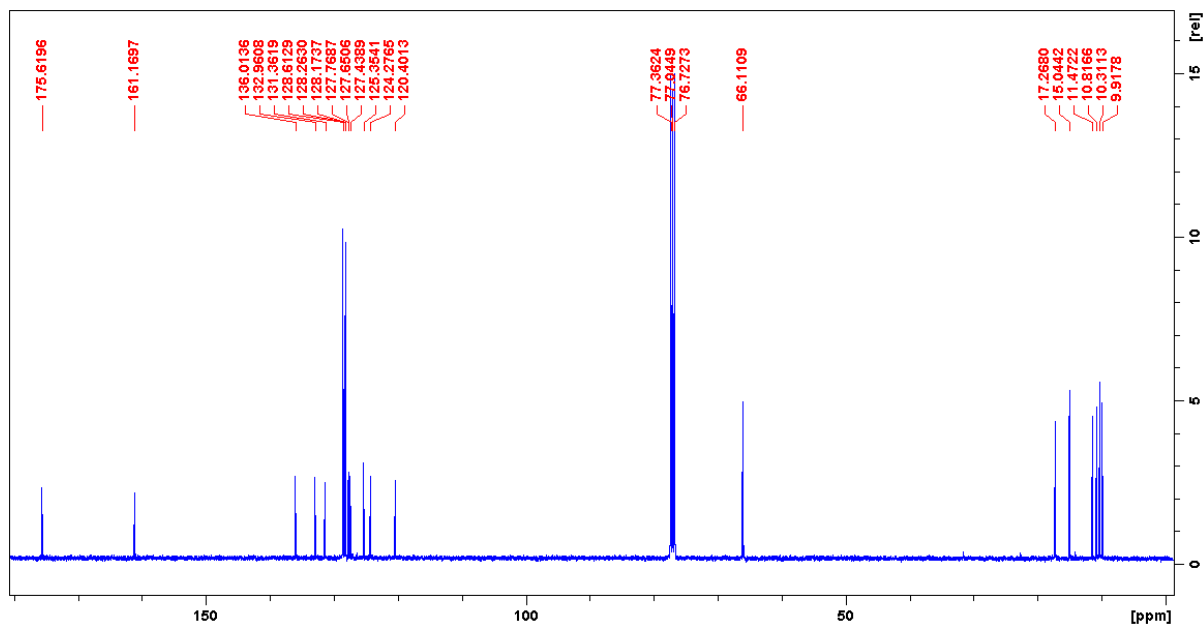

### <sup>1</sup>H NMR spectra of compound 5

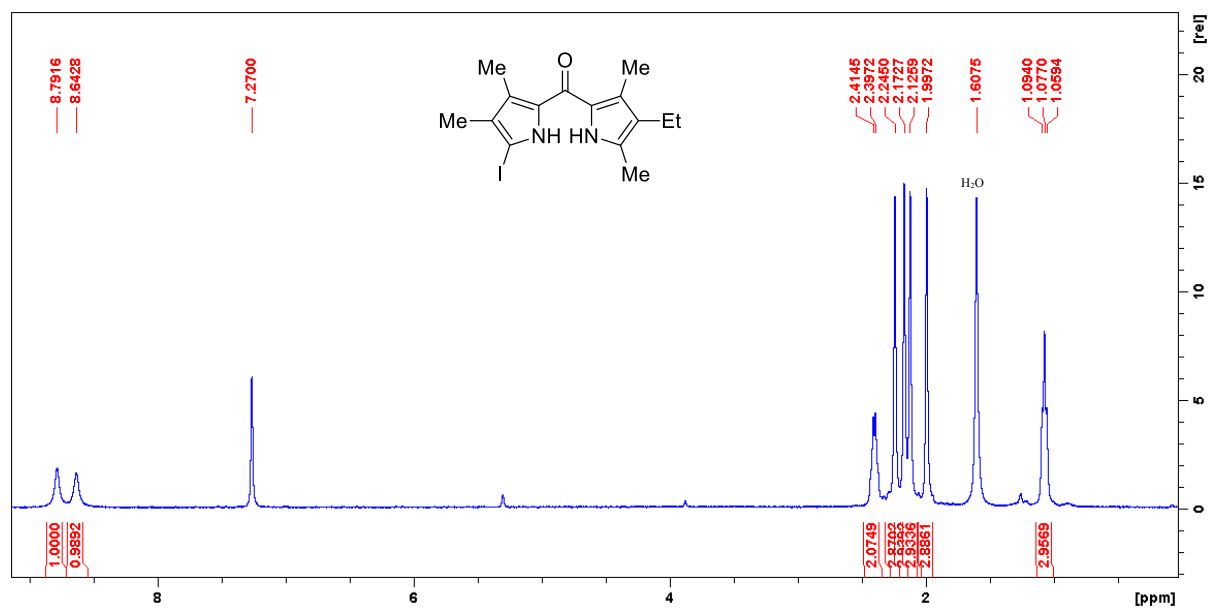

### <sup>13</sup>C NMR spectra of compound 5

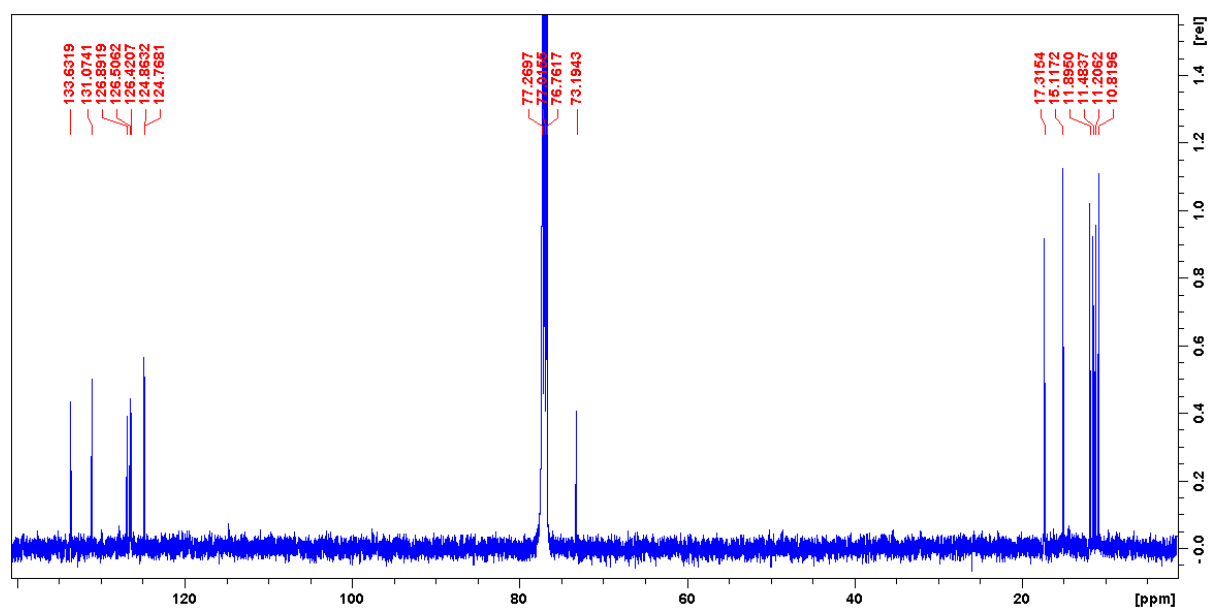



### <sup>1</sup>H NMR spectra of BODIPY 1a

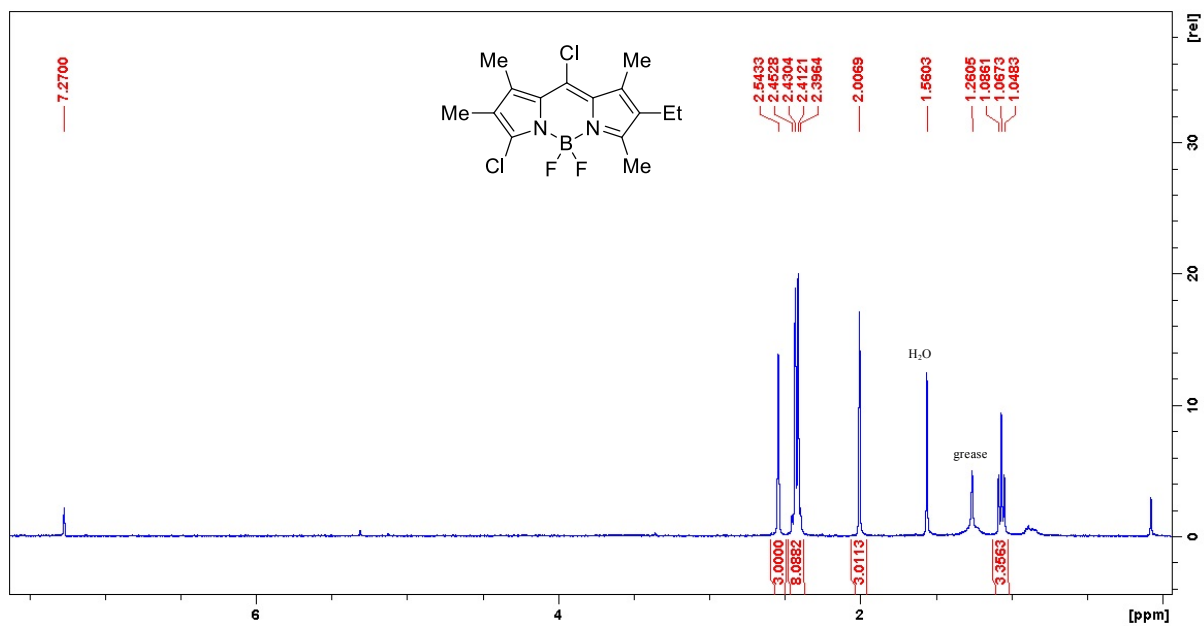

### <sup>13</sup>C NMR spectra of BODIPY 1a

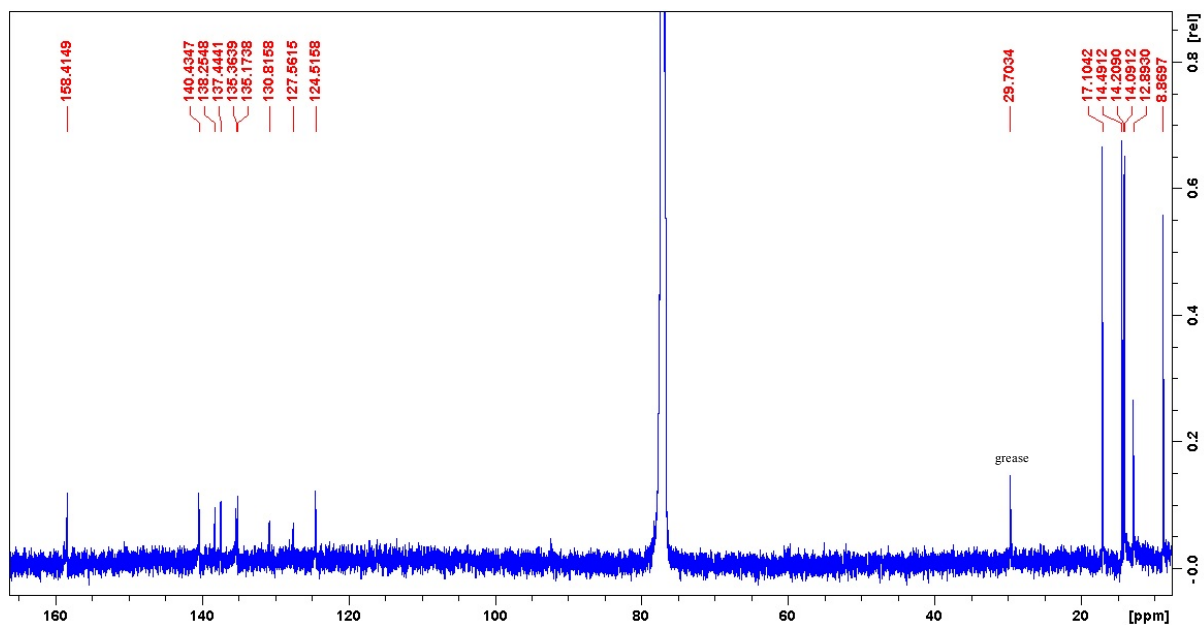

### <sup>1</sup>H NMR spectra of BODIPY **1b**

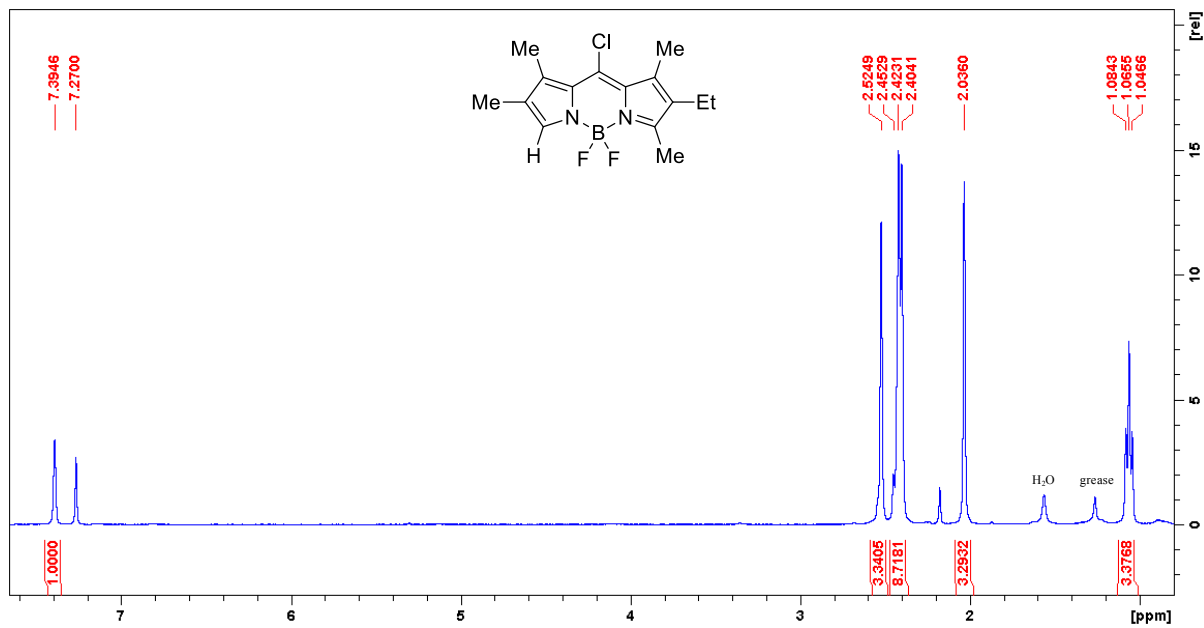

### <sup>13</sup>C NMR spectra of BODIPY **1b**

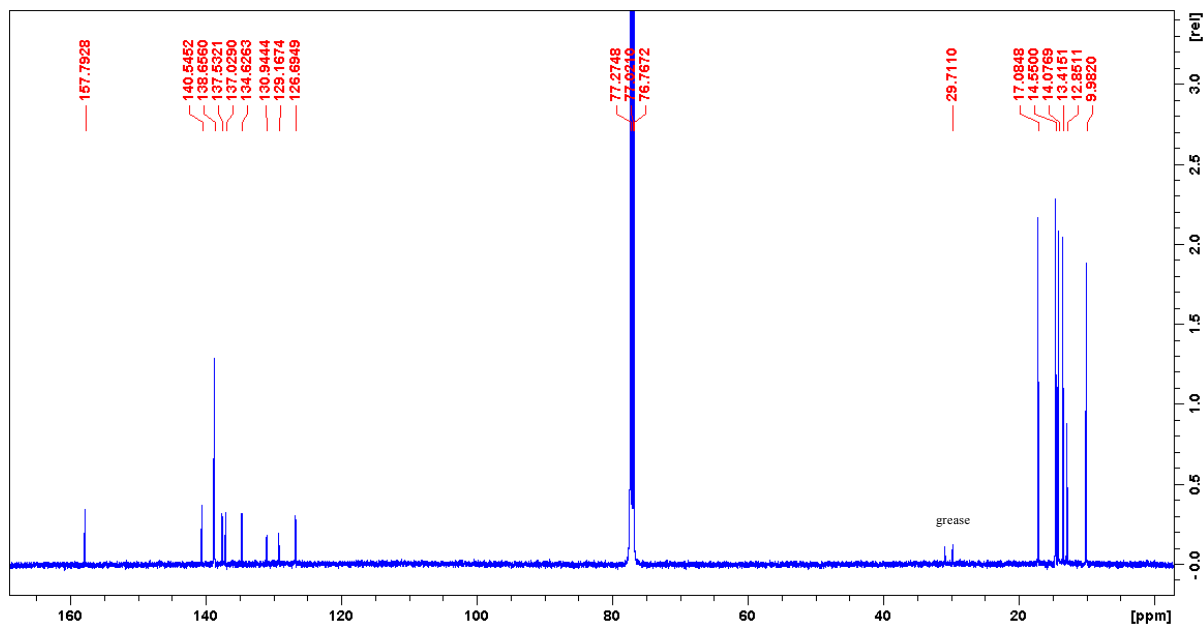

<sup>1</sup>H NMR spectra of BODIPY 6a

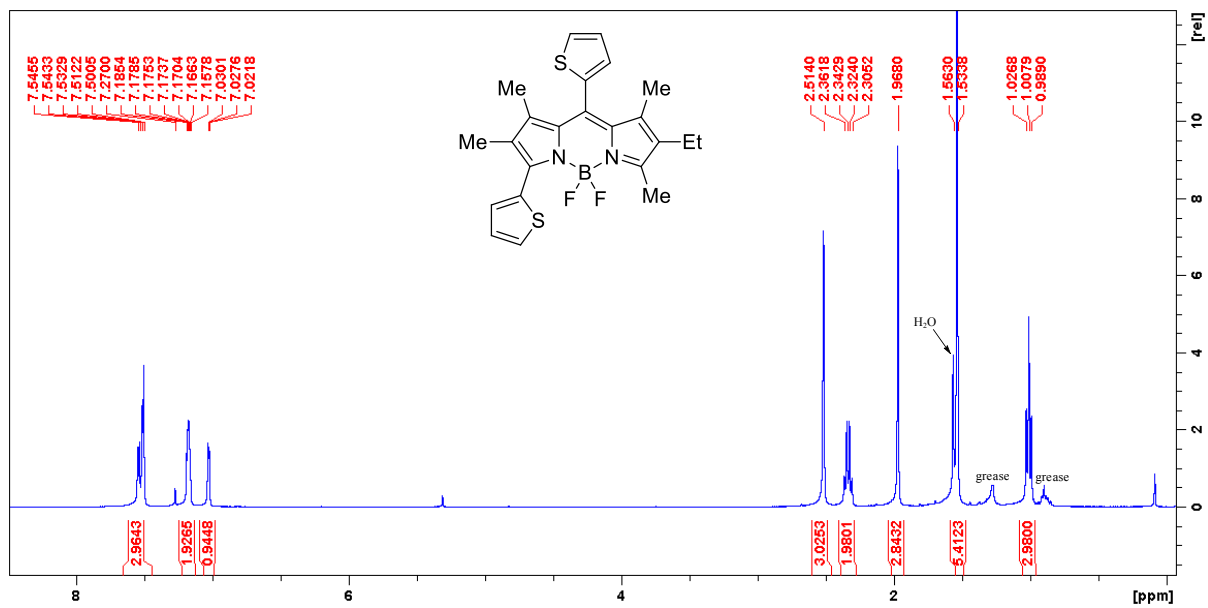

<sup>13</sup>C NMR spectra of BODIPY 6a

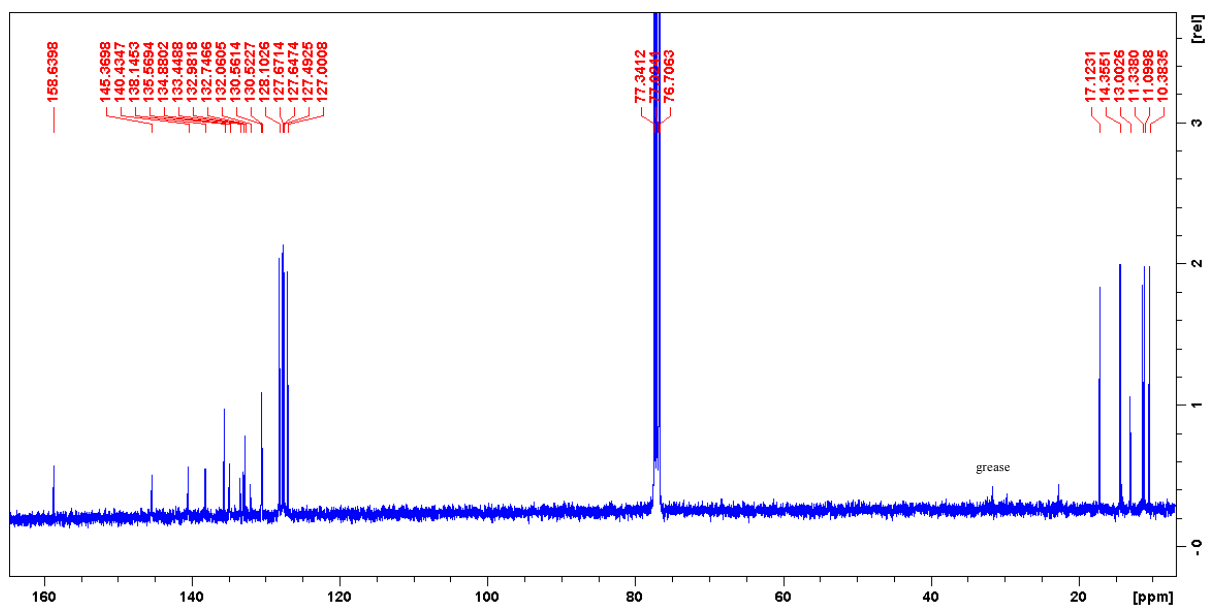

### <sup>1</sup>H NMR spectra of BODIPY **6b**

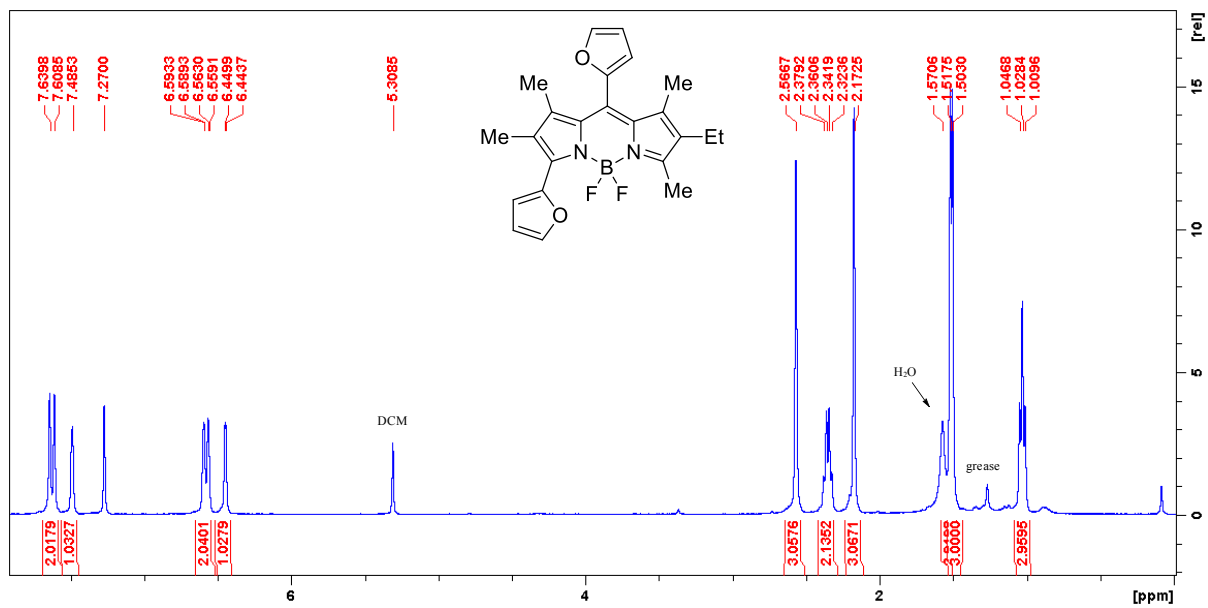

### <sup>13</sup>C NMR spectra of BODIPY **6b**

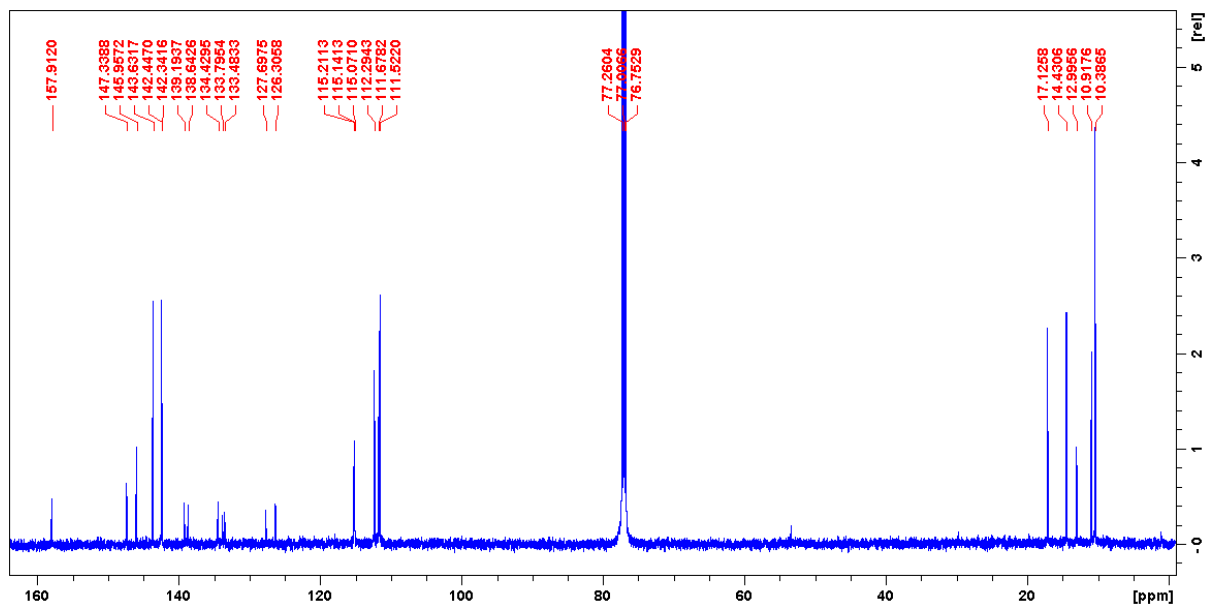

### $^1\text{H}$ NMR spectra of BODIPY **6c**

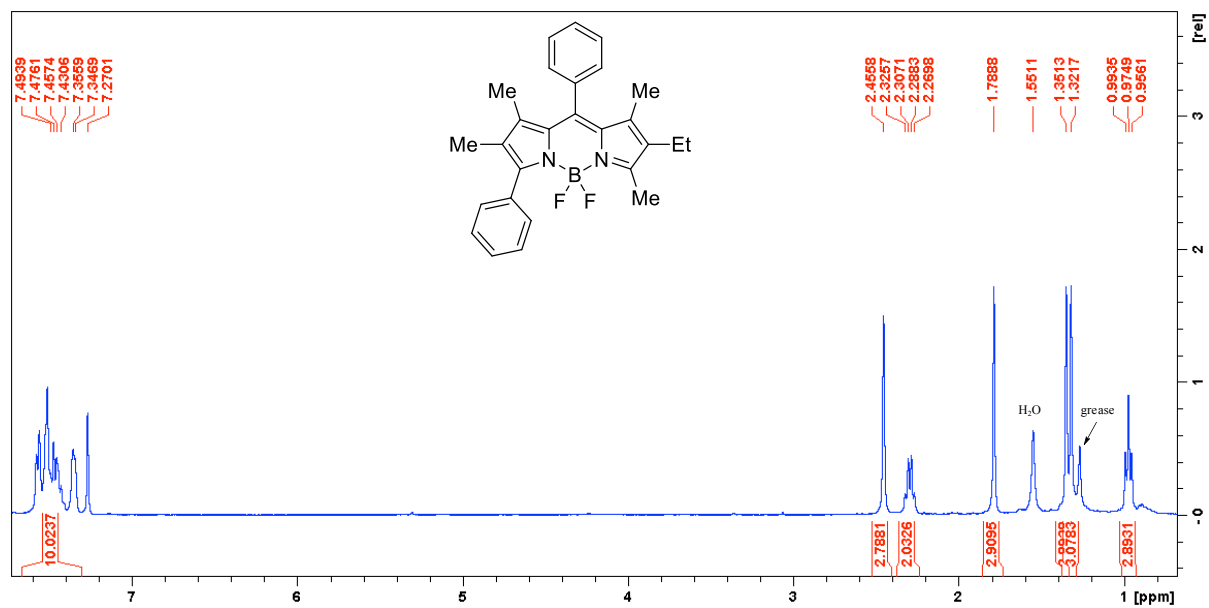

### $^{13}\text{C}$ NMR spectra of BODIPY **6c**

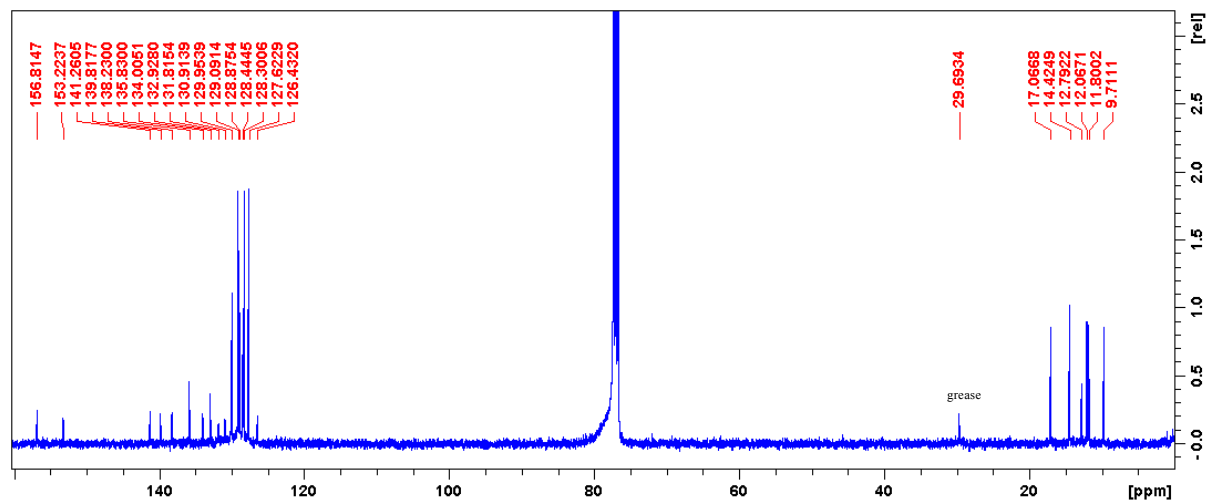

### <sup>1</sup>H NMR spectra of BODIPY 7a

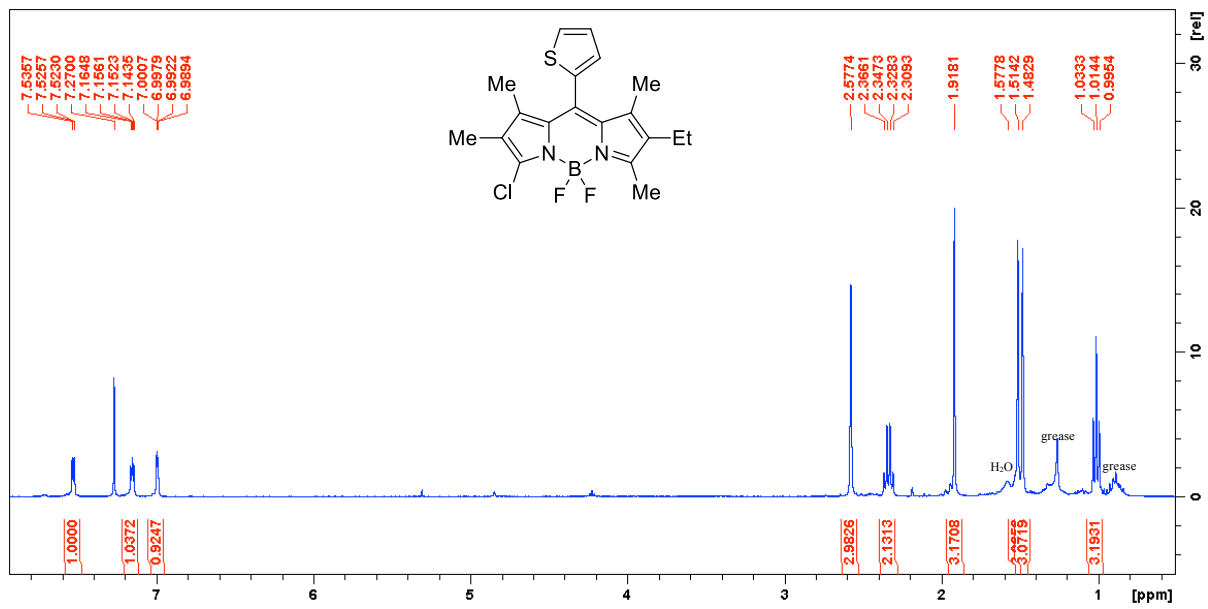

### <sup>13</sup>C NMR spectra of BODIPY 7a

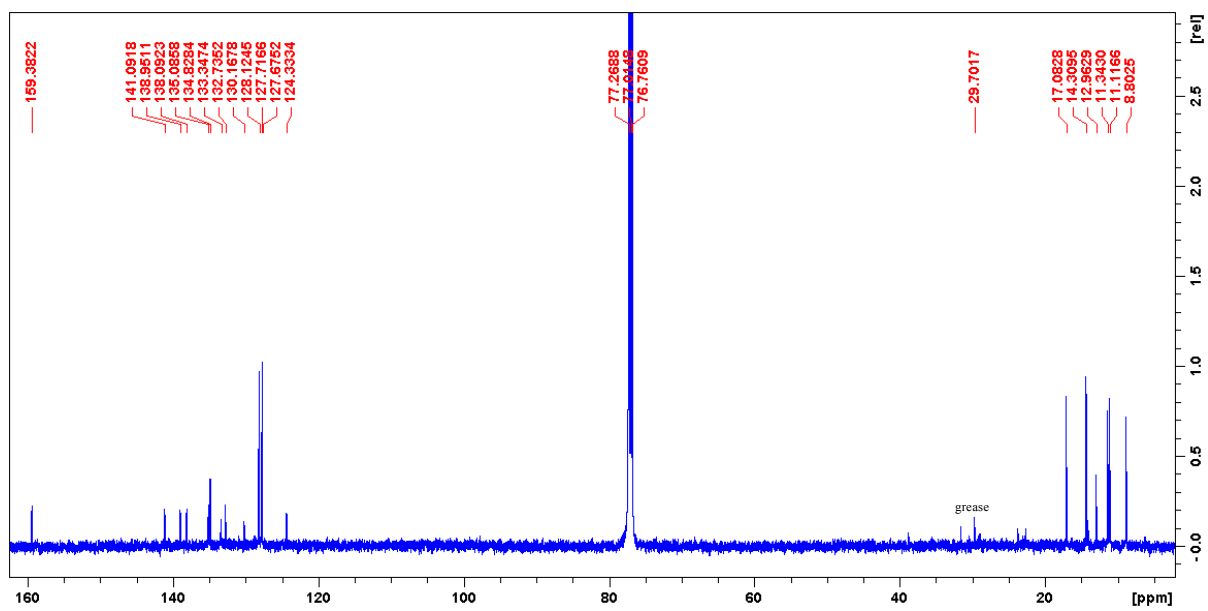

### $^1\text{H}$ NMR spectra of BODIPY **7b**

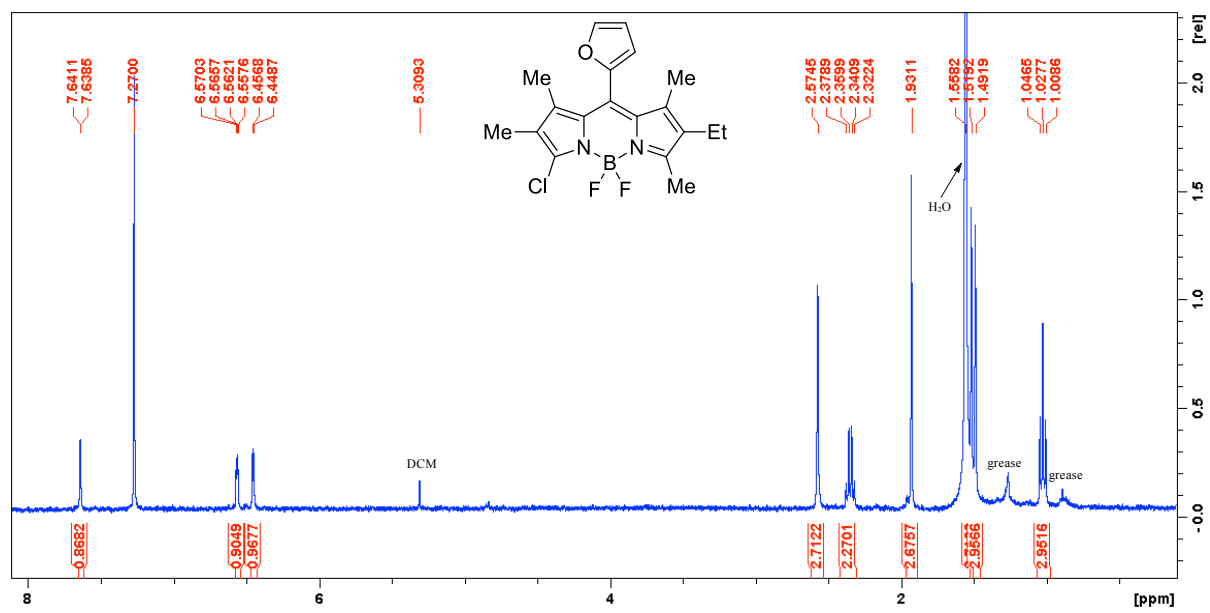

### $^{13}\text{C}$ NMR spectra of BODIPY **7b**

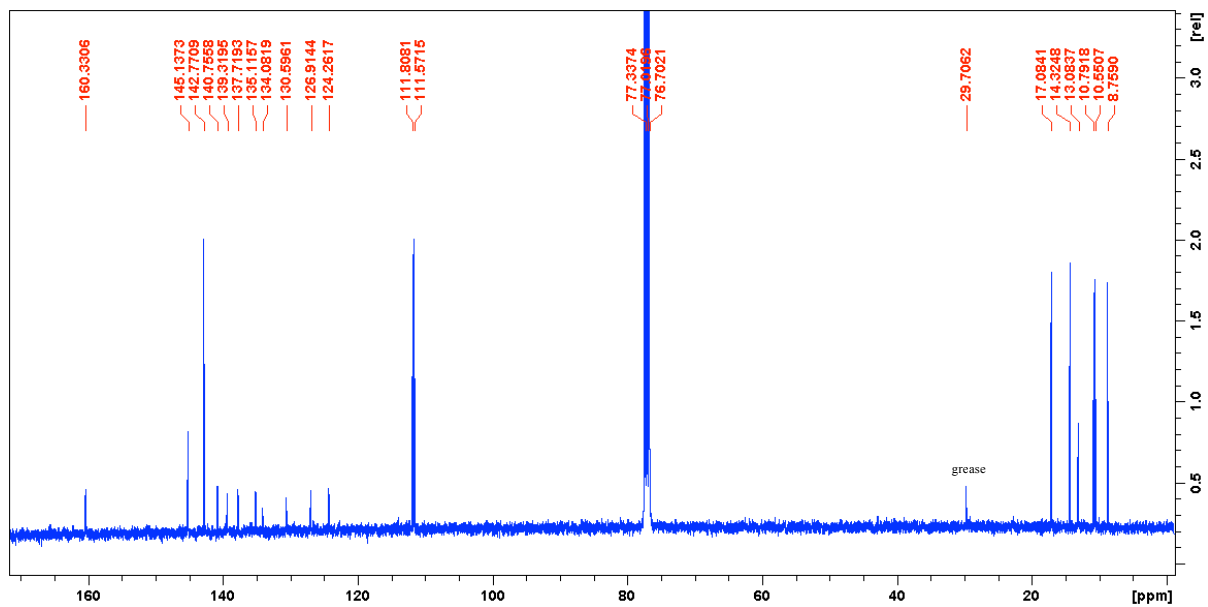

<sup>1</sup>H NMR spectra of BODIPY 7c

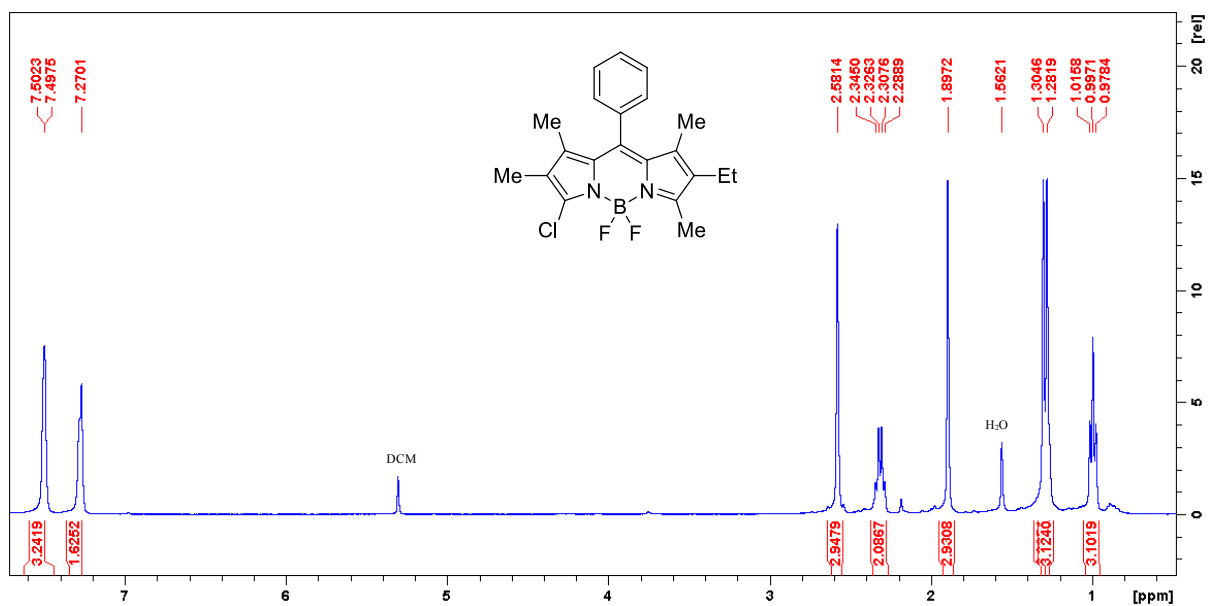

<sup>13</sup>C NMR spectra of BODIPY 7c



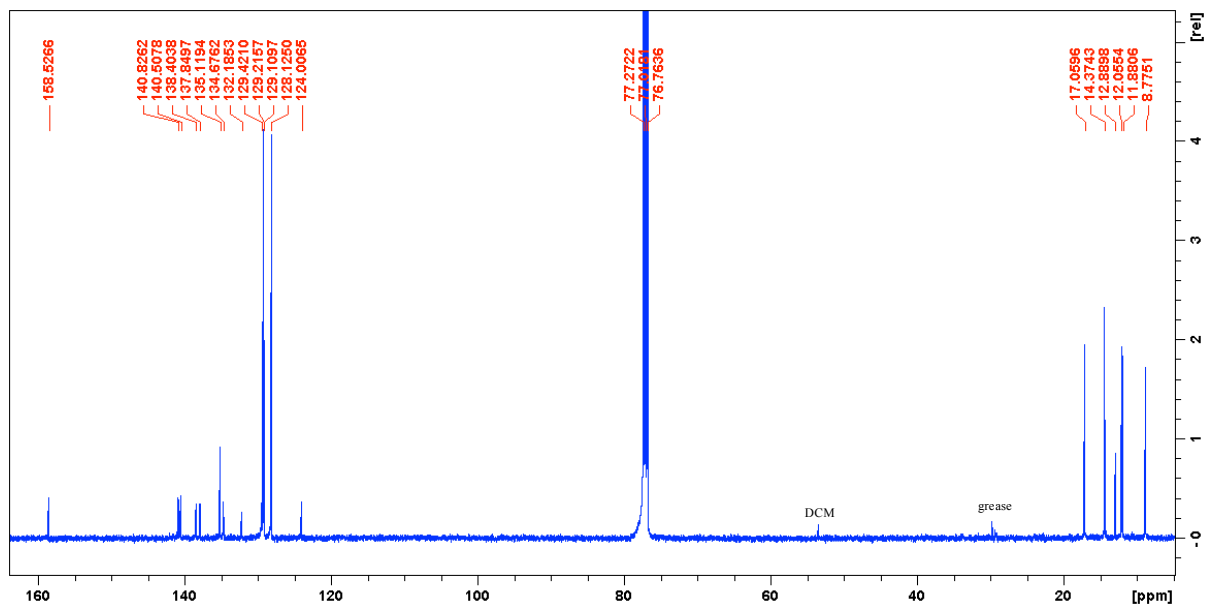

<sup>1</sup>H NMR spectra of BODIPY 8

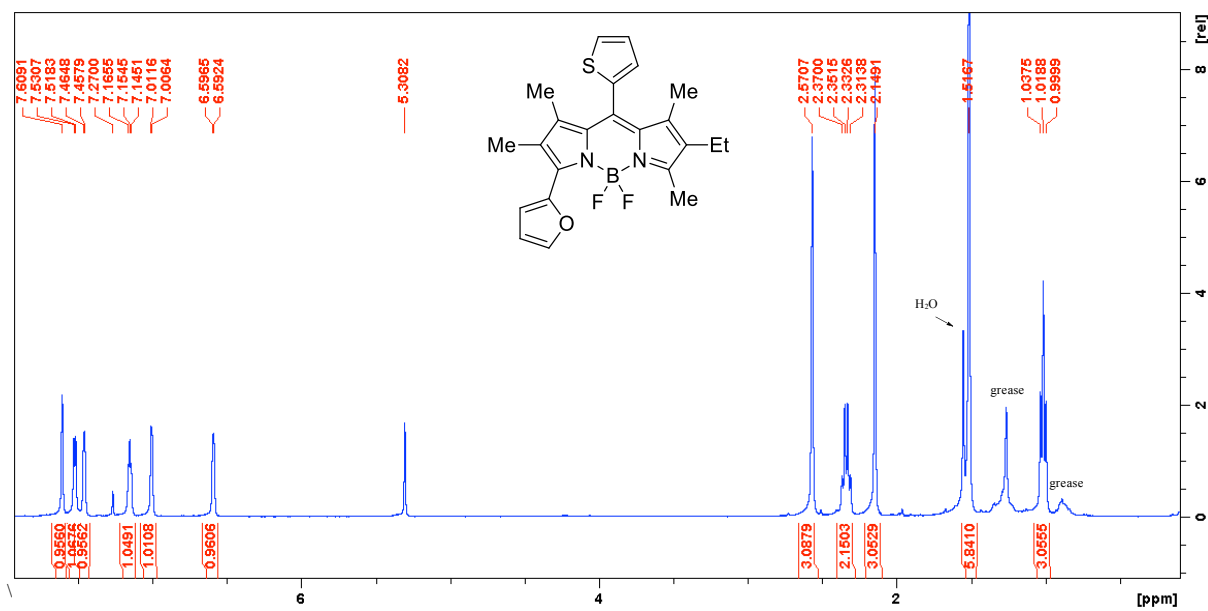

<sup>13</sup>C NMR spectra of BODIPY 8

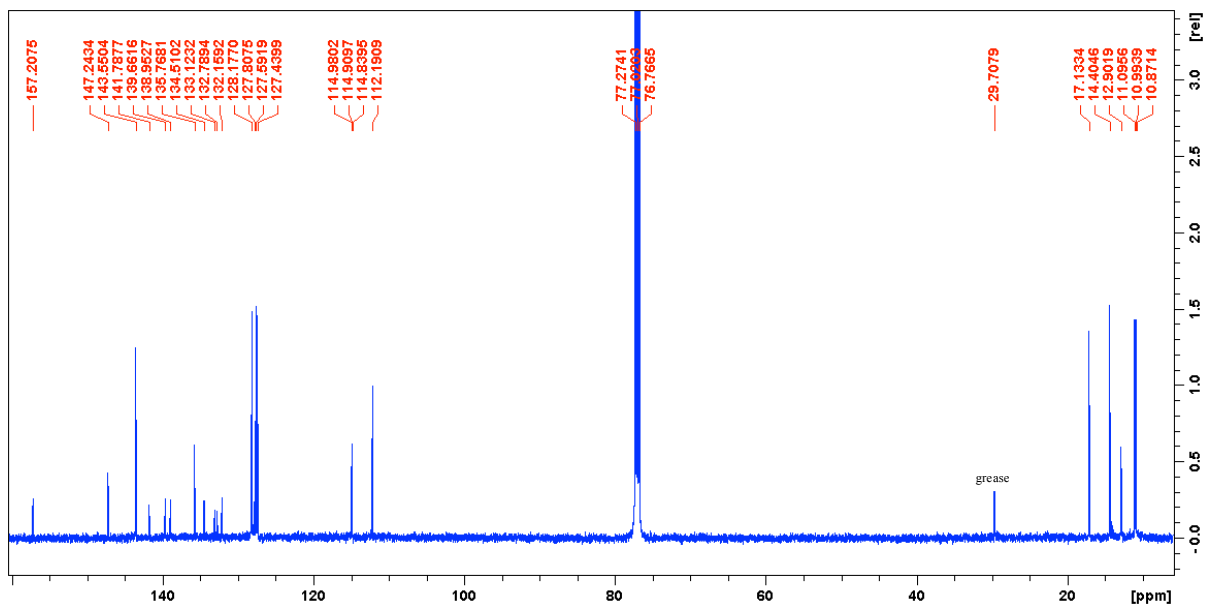

<sup>1</sup>H NMR spectra of BODIPY 9

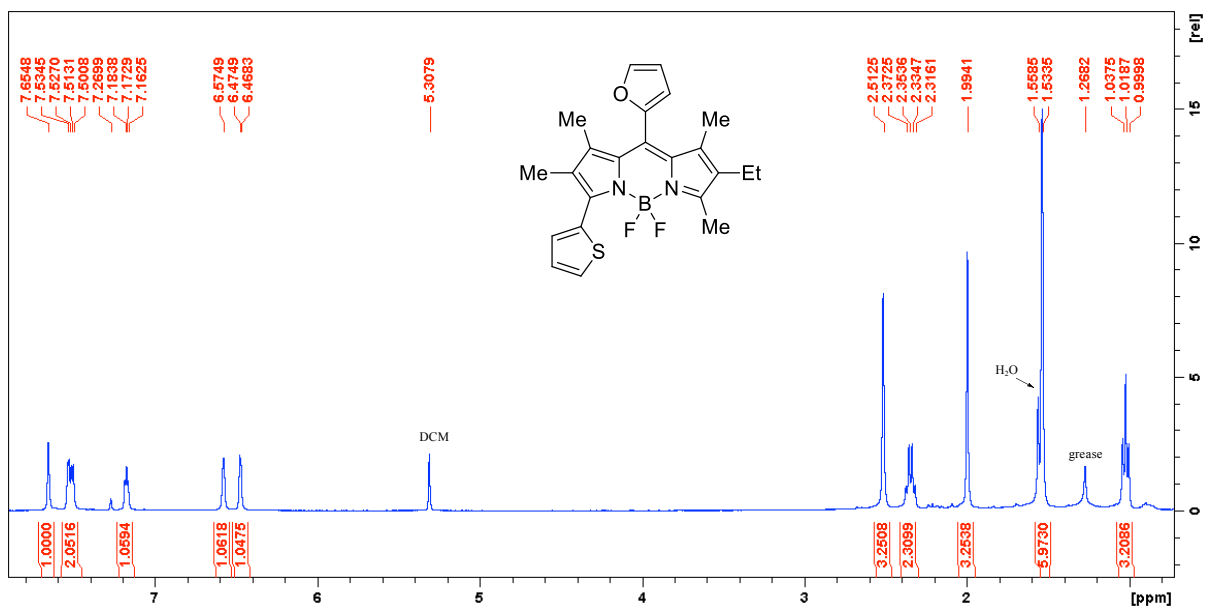

<sup>13</sup>C NMR spectra of BODIPY 9

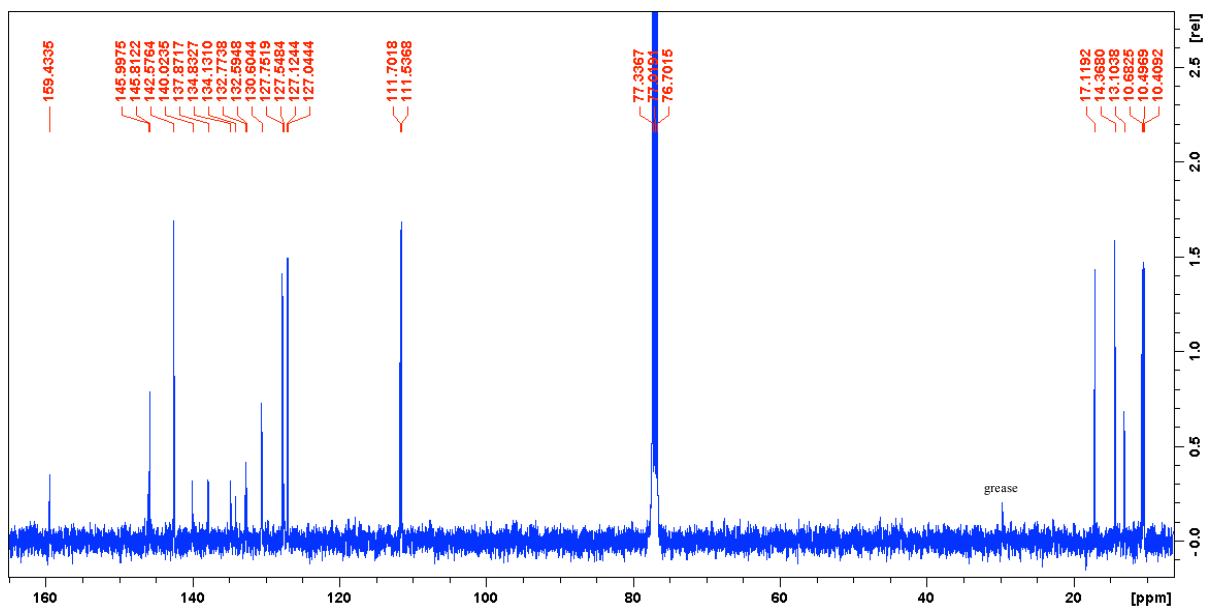

<sup>1</sup>H NMR spectra of BODIPY 10

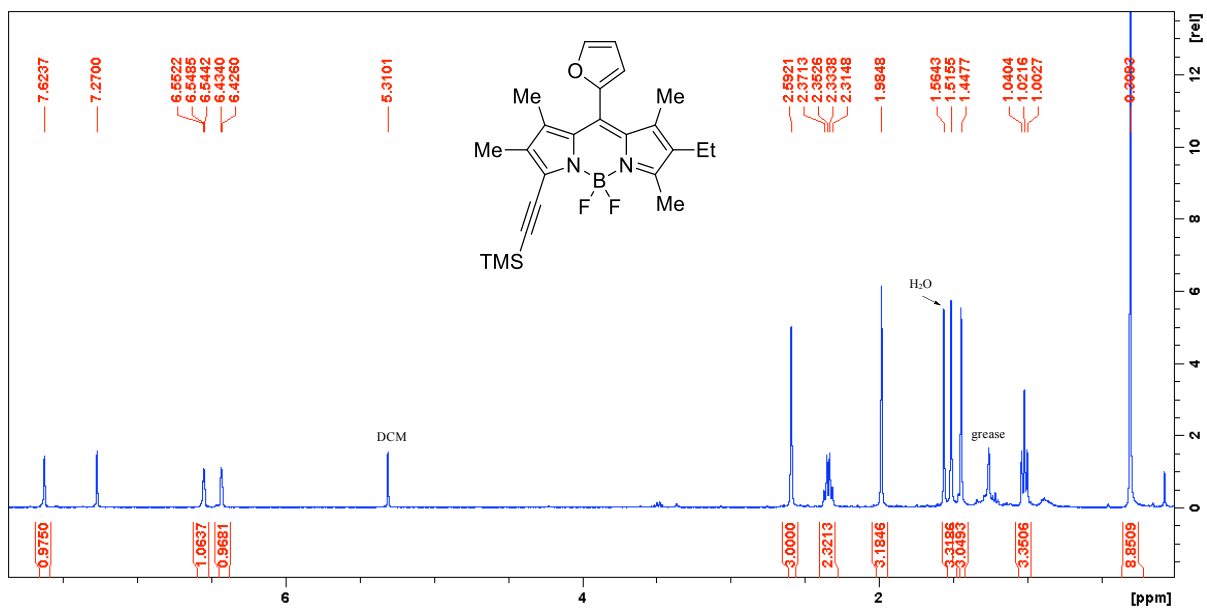

<sup>13</sup>C NMR spectra of BODIPY 10

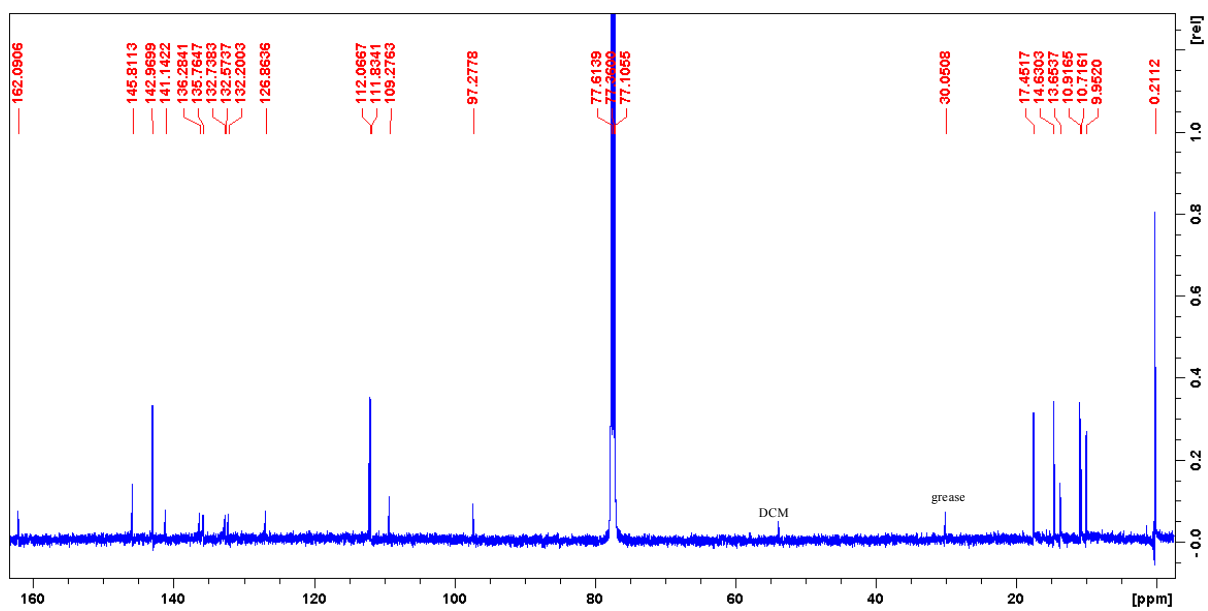

<sup>1</sup>H NMR spectra of BODIPY 11

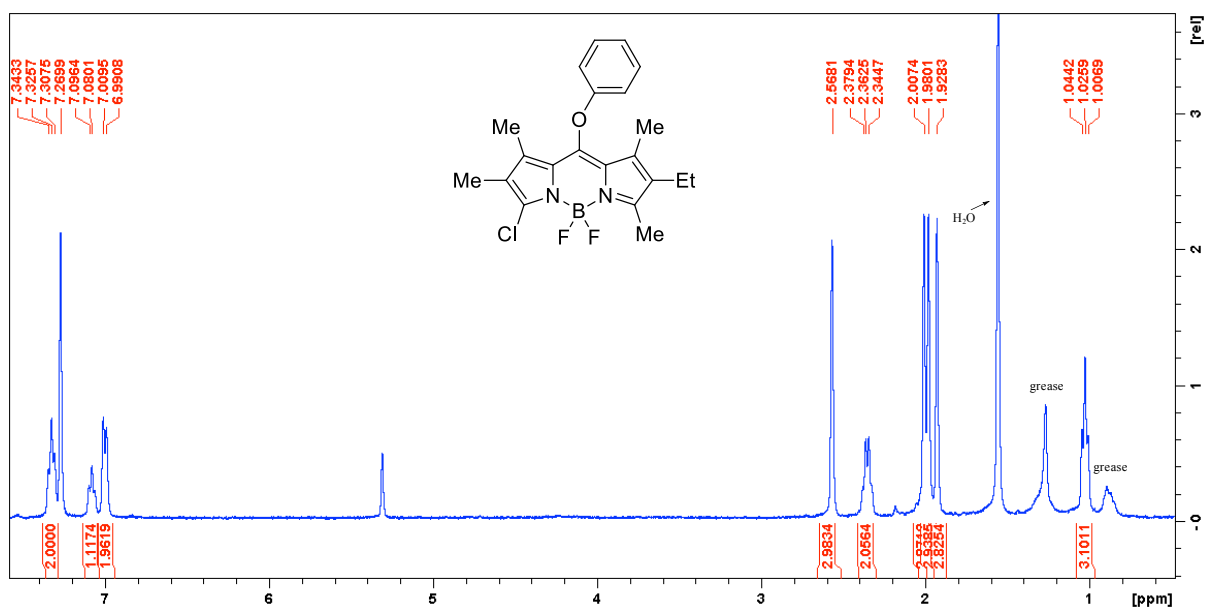

<sup>13</sup>C NMR spectra of BODIPY 11

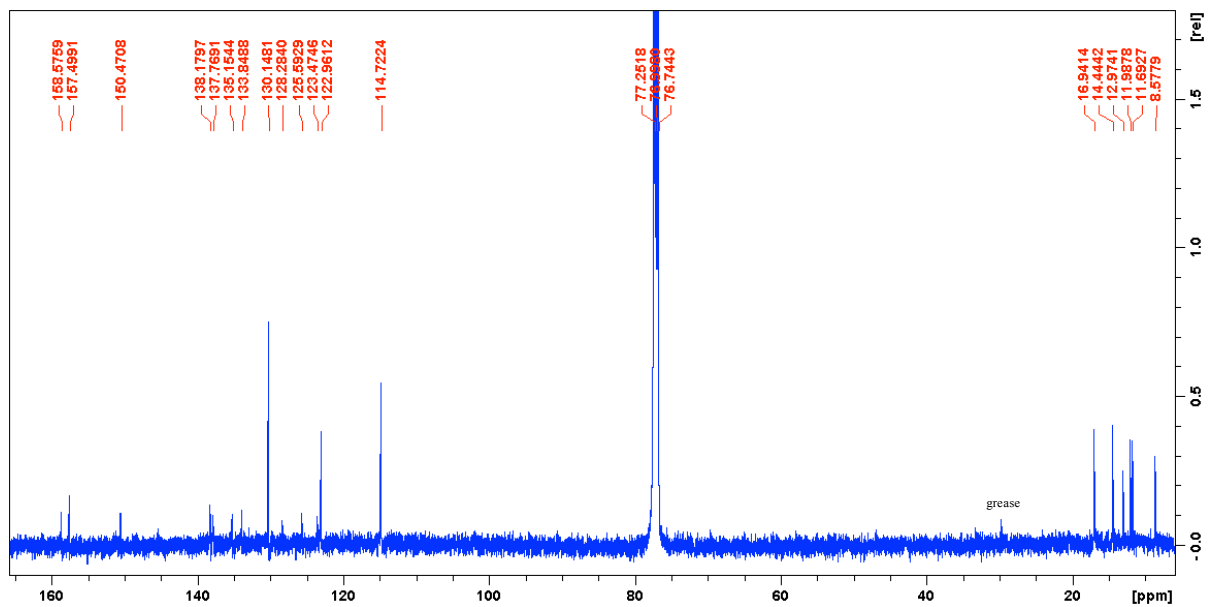

**<sup>1</sup>H NMR of BODIPY 12**

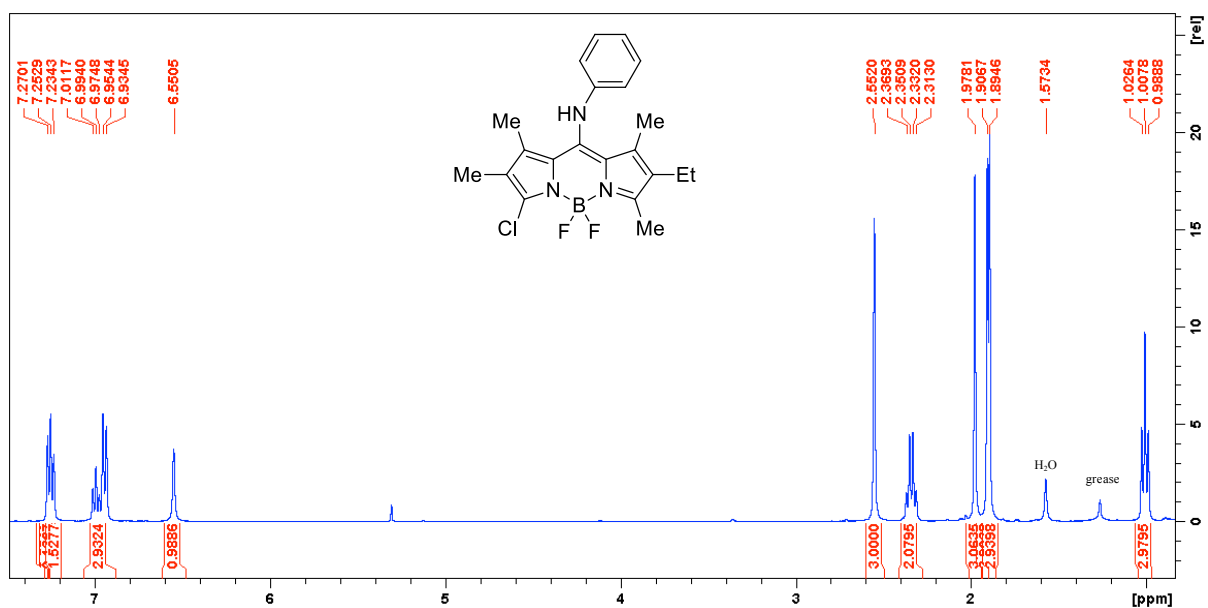

**<sup>13</sup>C NMR of BODIPY 12**

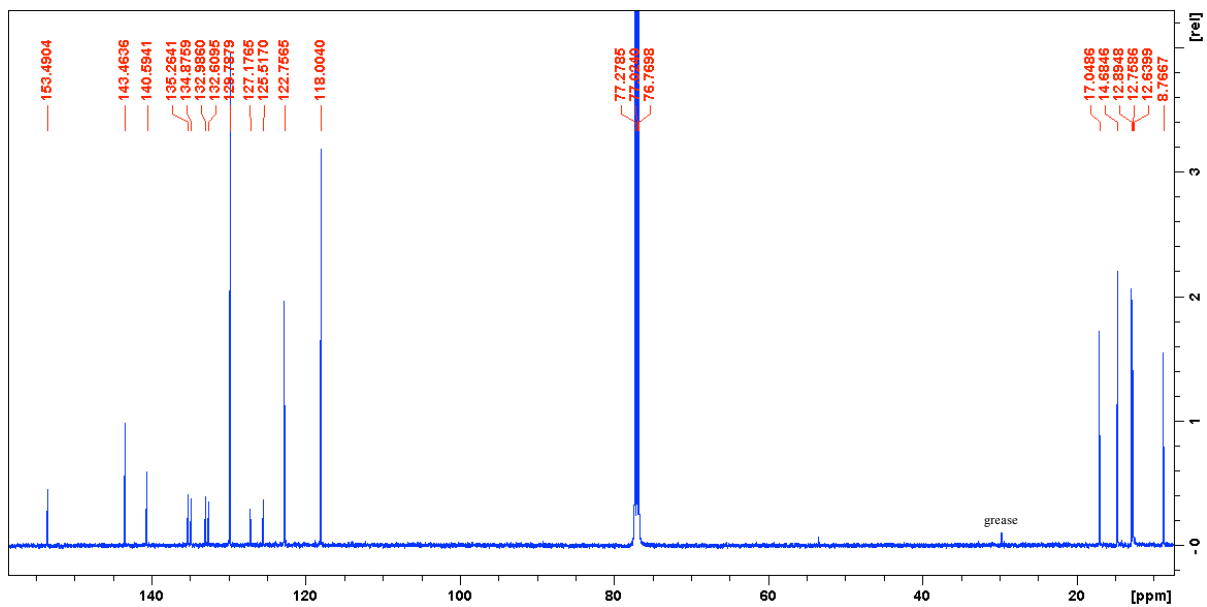

<sup>1</sup>H NMR spectra of BODIPY 13

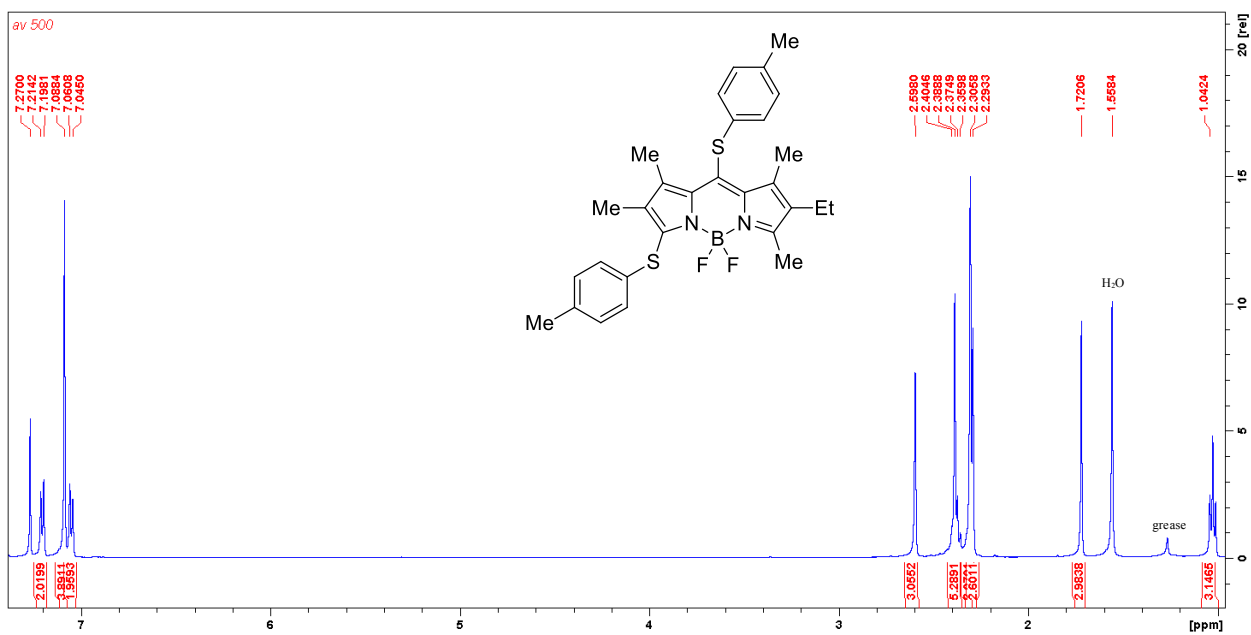

<sup>13</sup>C NMR spectra of BODIPY 13

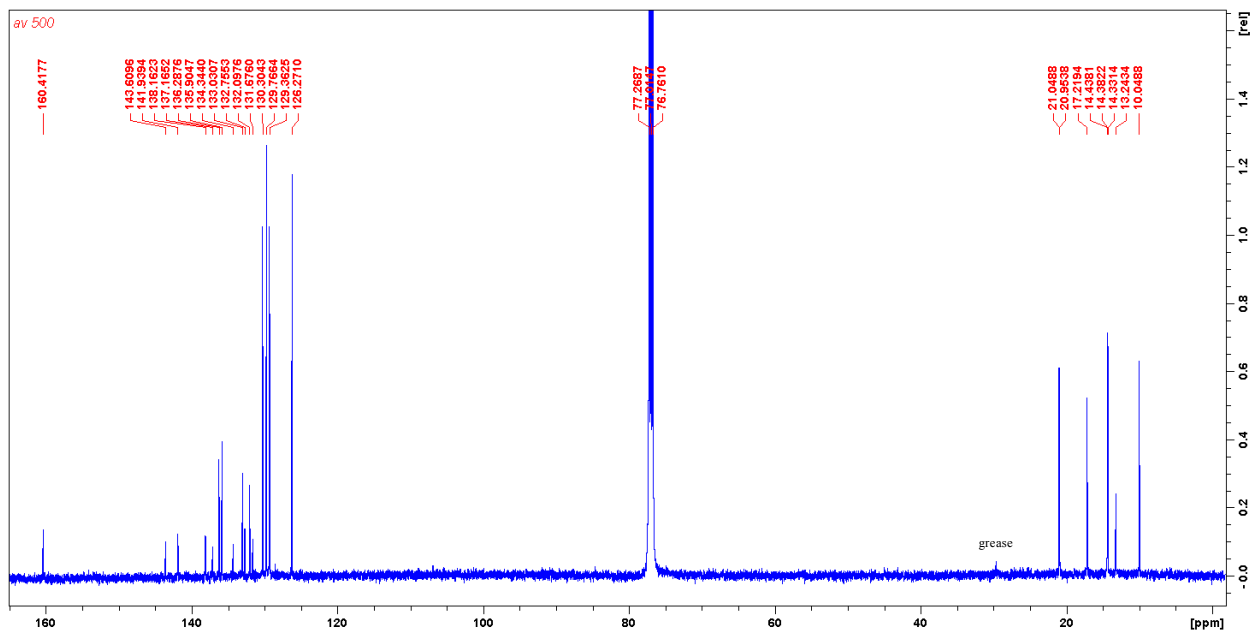

<sup>1</sup>H NMR spectra of BODIPY 14

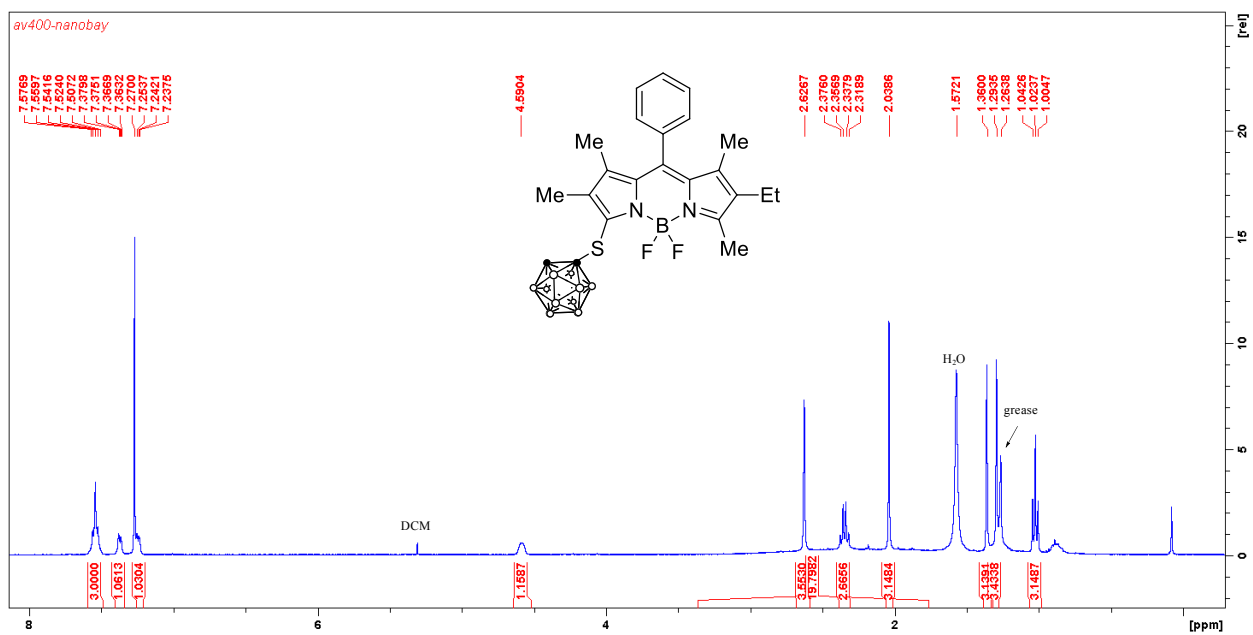

<sup>13</sup>C NMR spectra of BODIPY 14

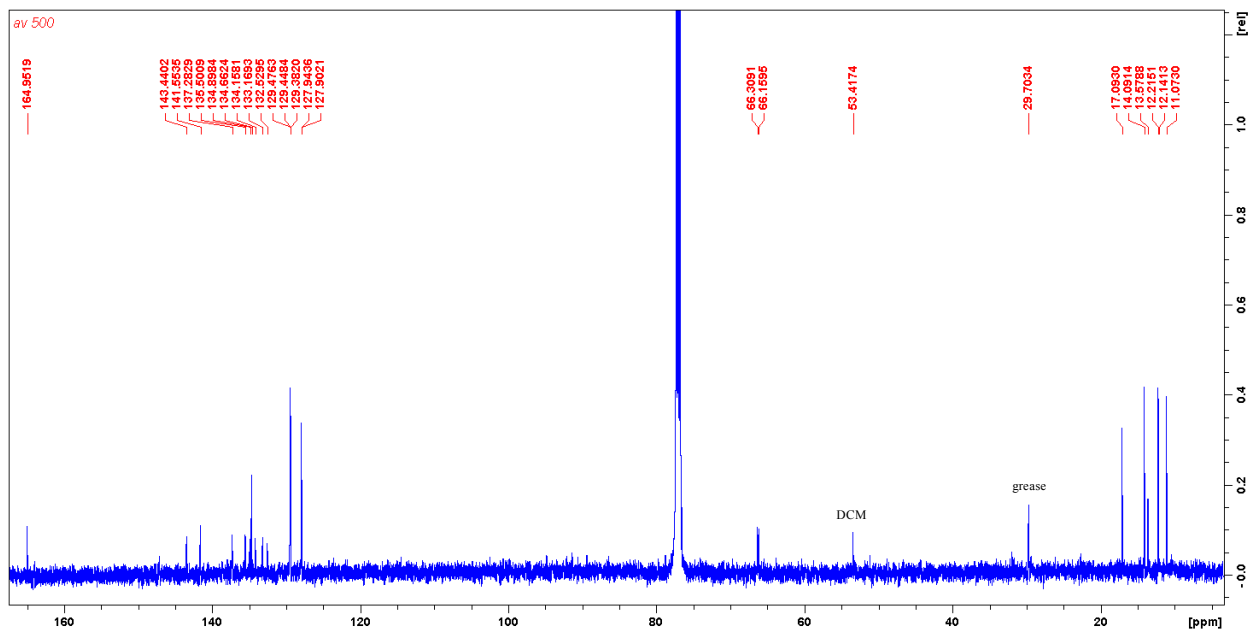

<sup>1</sup>H NMR spectra of BODIPY 15

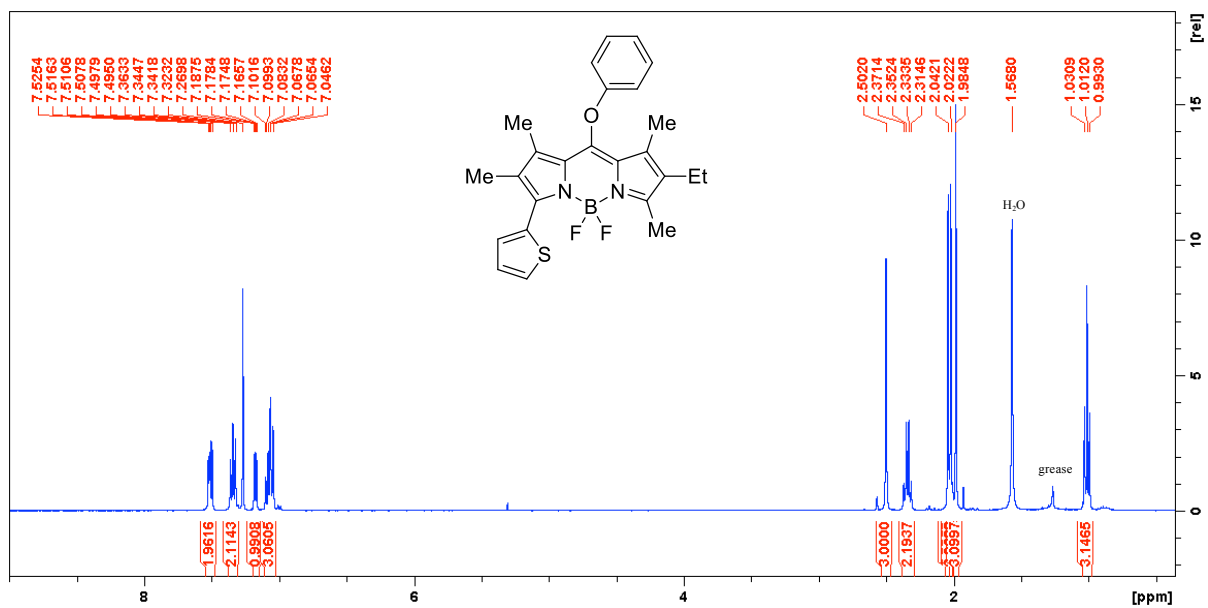

<sup>13</sup>C NMR spectra of BODIPY 15



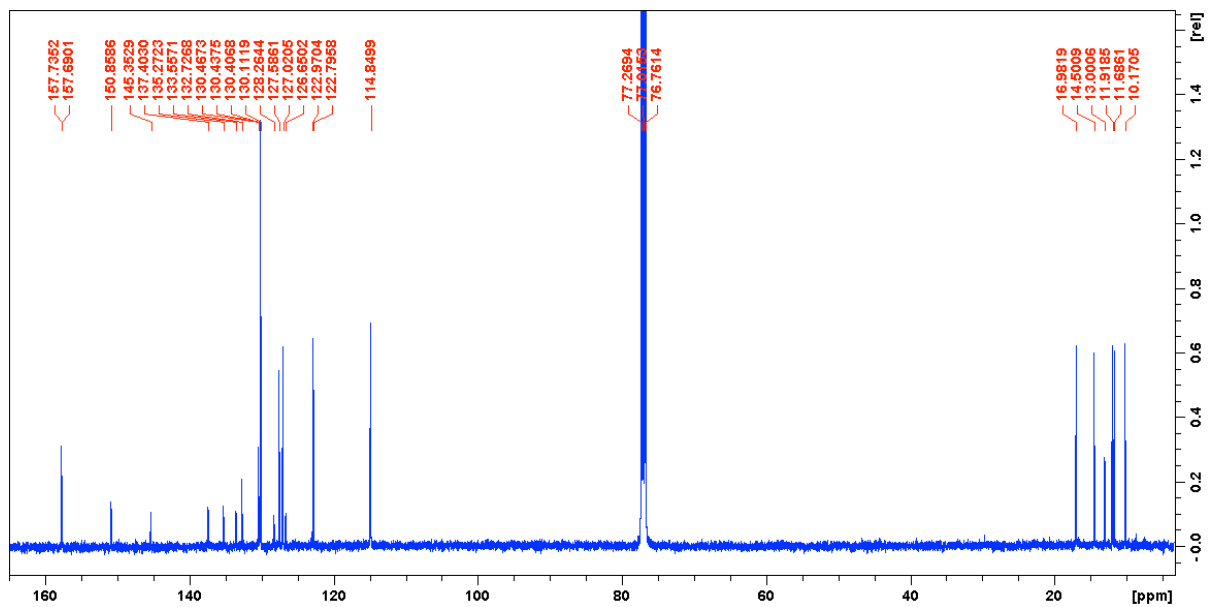

<sup>1</sup>H NMR spectra of BODIPY 16

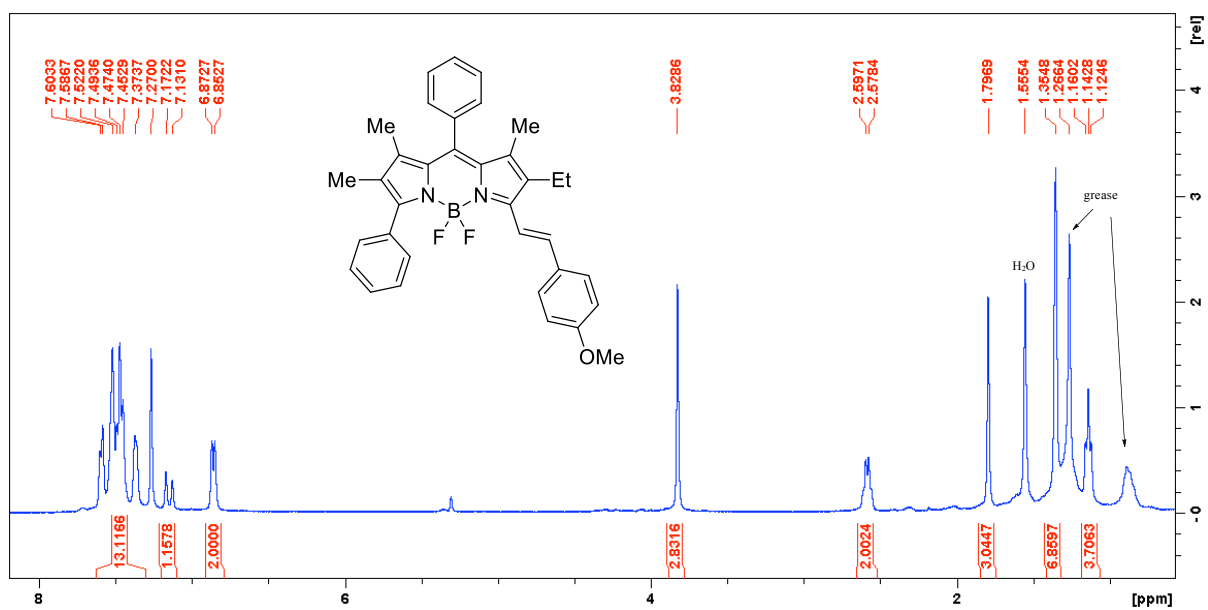

<sup>13</sup>C NMR spectra of BODIPY 16

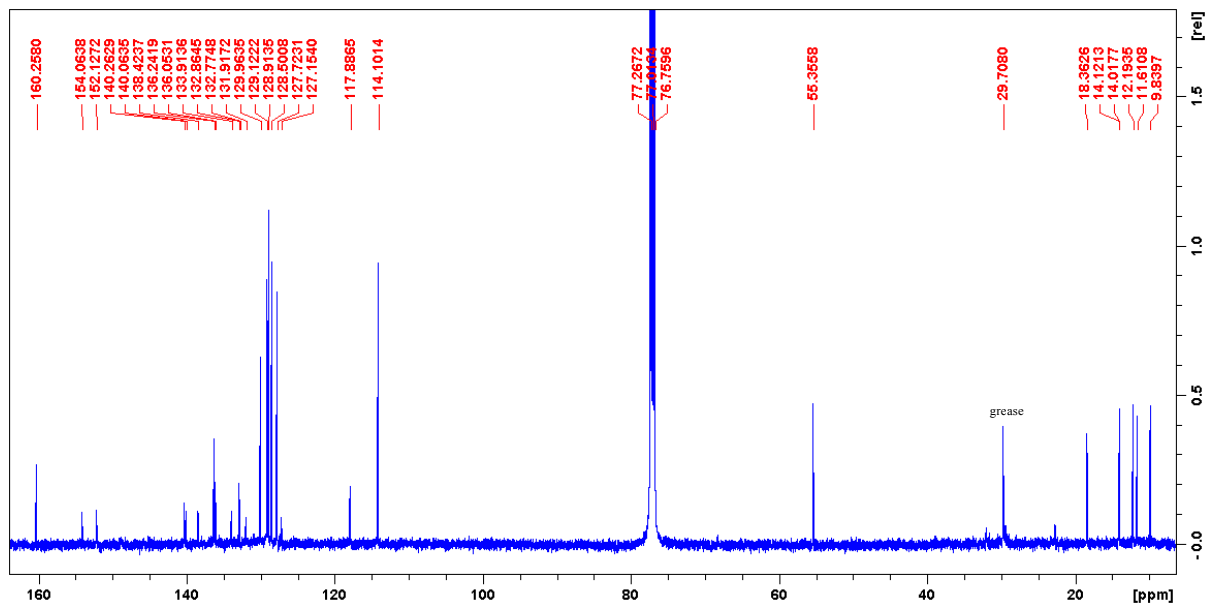

<sup>1</sup>H NMR spectra of BODIPY 17

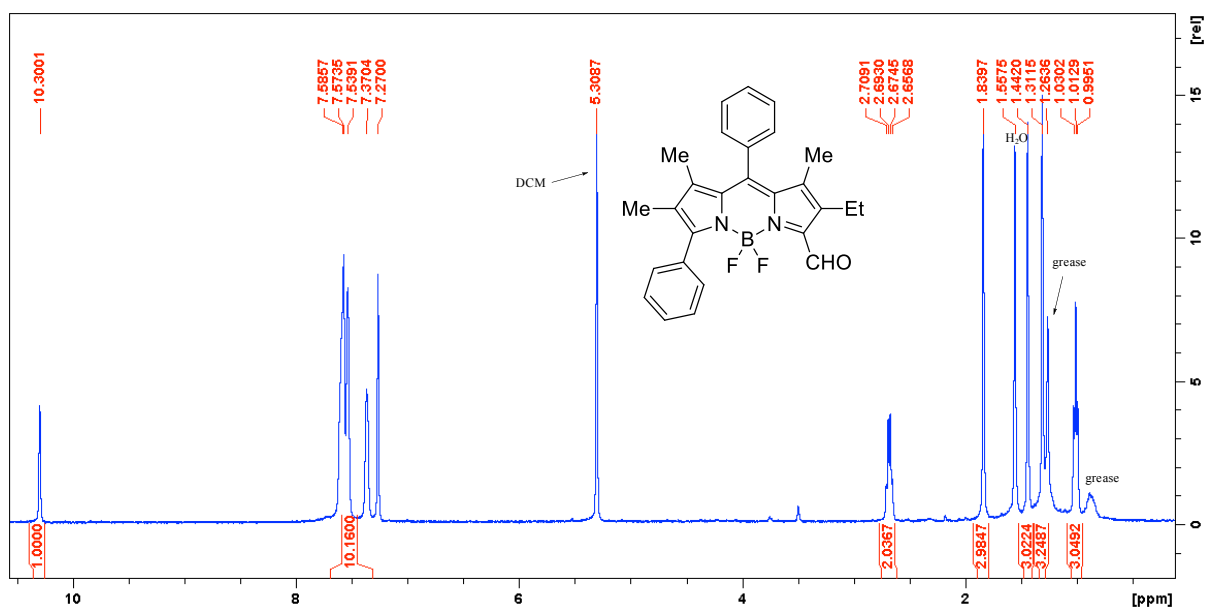

<sup>13</sup>C NMR spectra of BODIPY 17

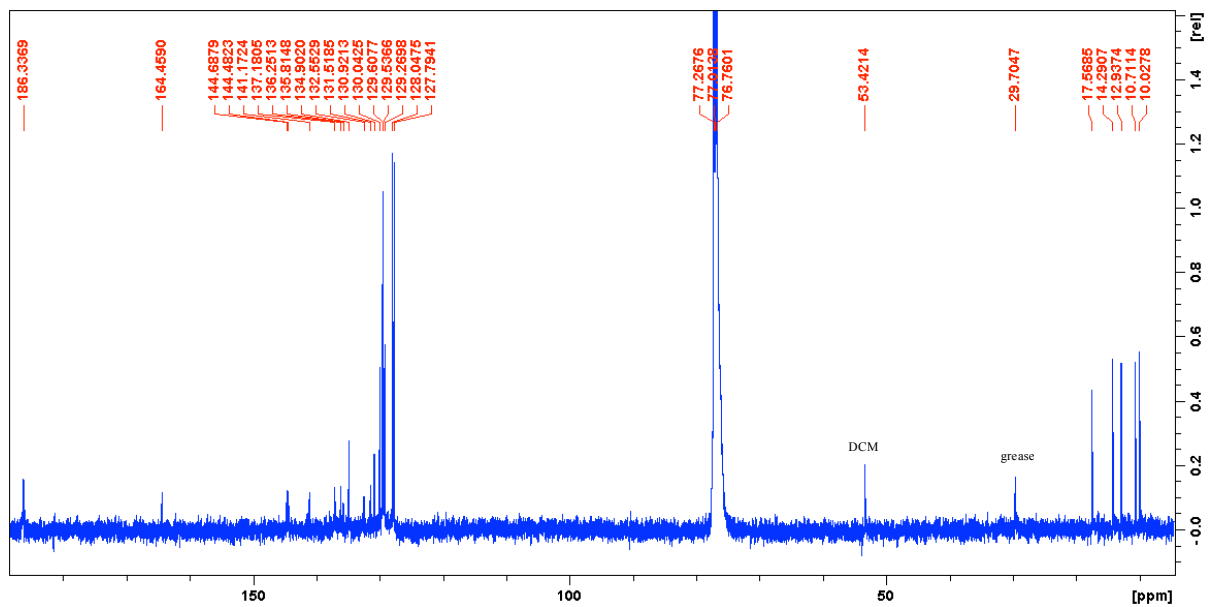

### Copies of $^{11}\text{B}$ NMR spectra

#### $^{11}\text{B}$ NMR spectra of BODIPY **1a**

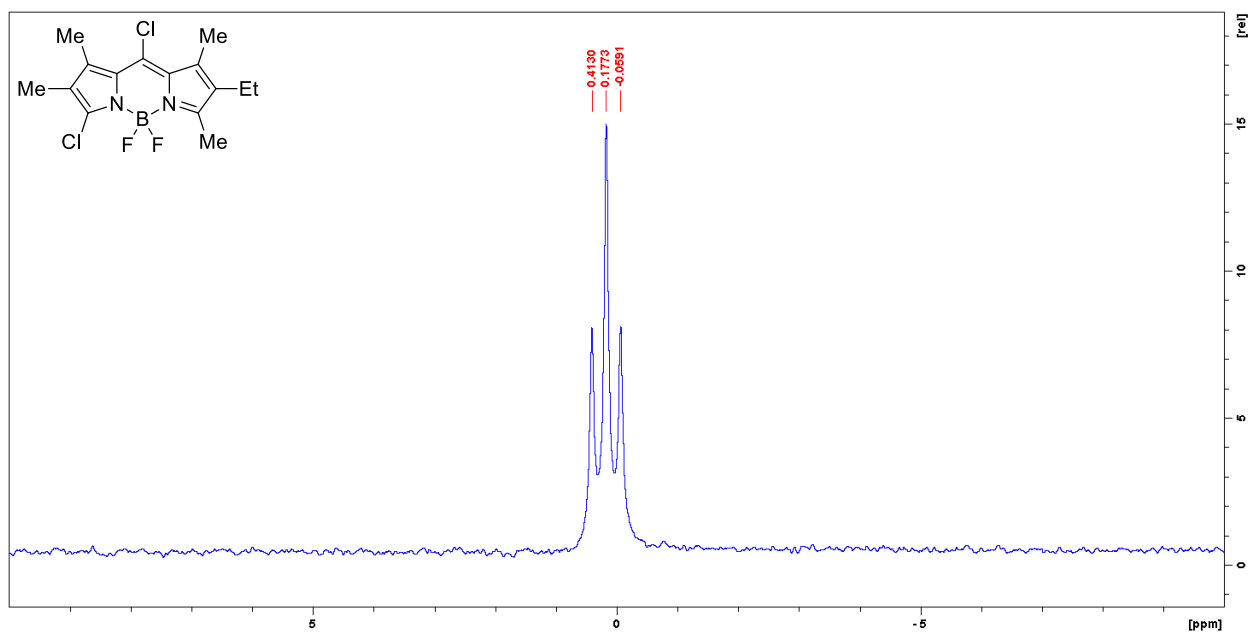

#### $^{11}\text{B}$ NMR spectra of BODIPY **1b**

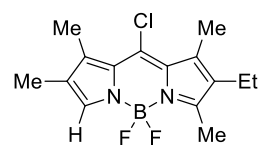

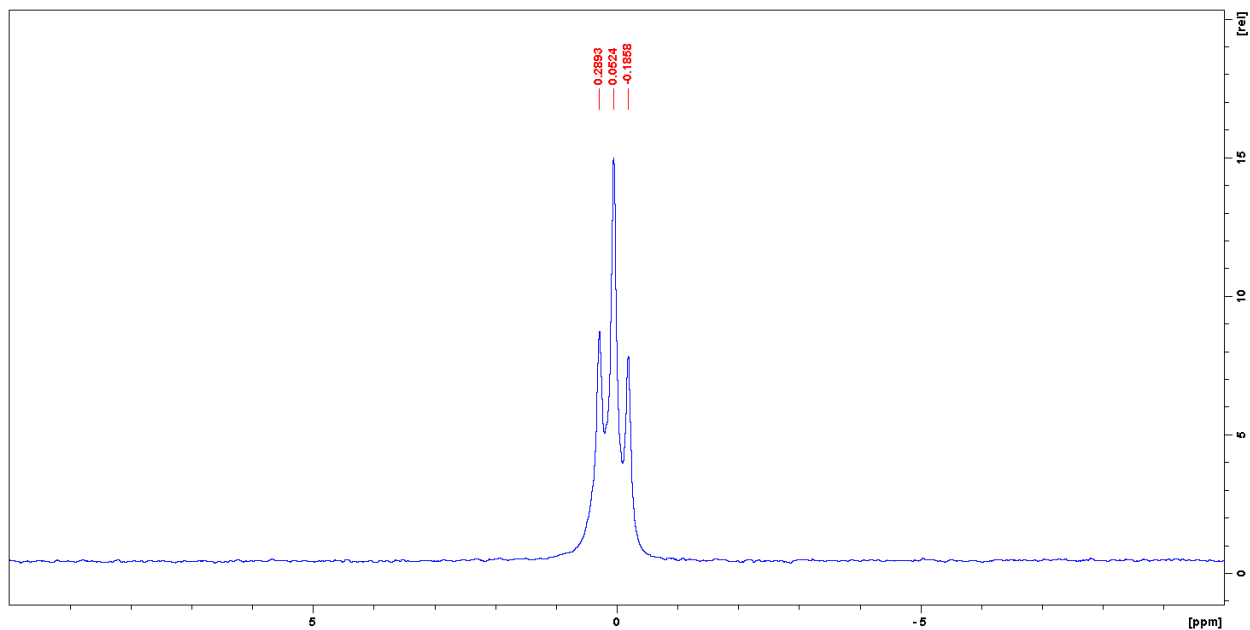

<sup>11</sup>B NMR spectra of BODIPY **6a**

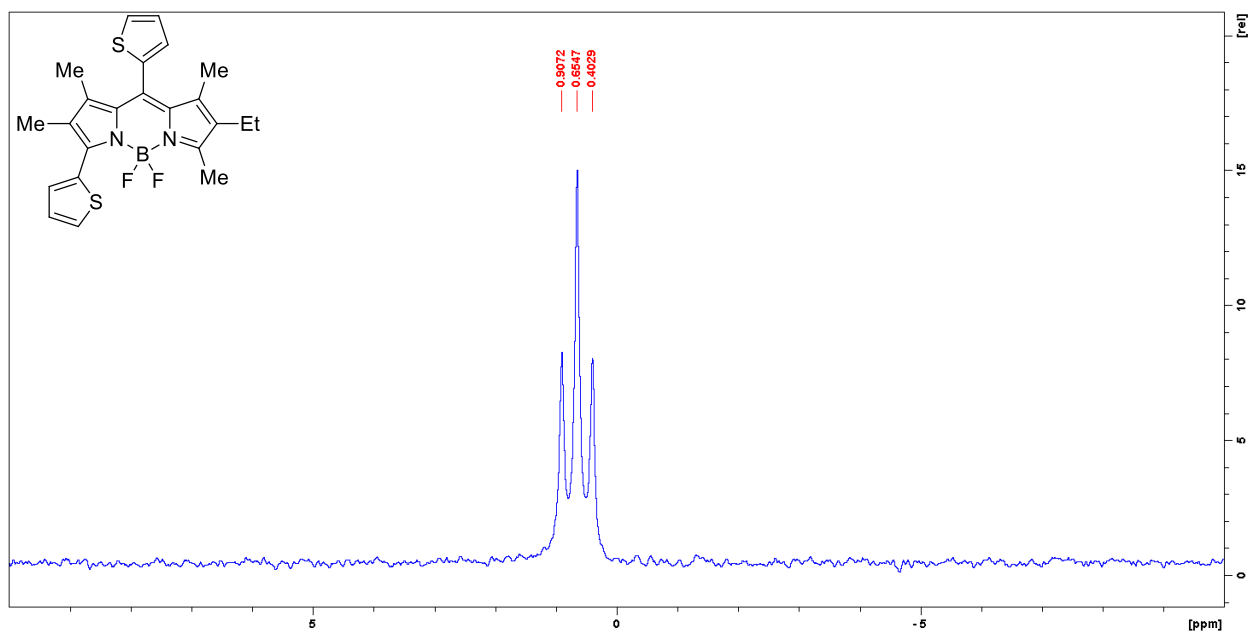

<sup>11</sup>B NMR spectra of BODIPY **6b**

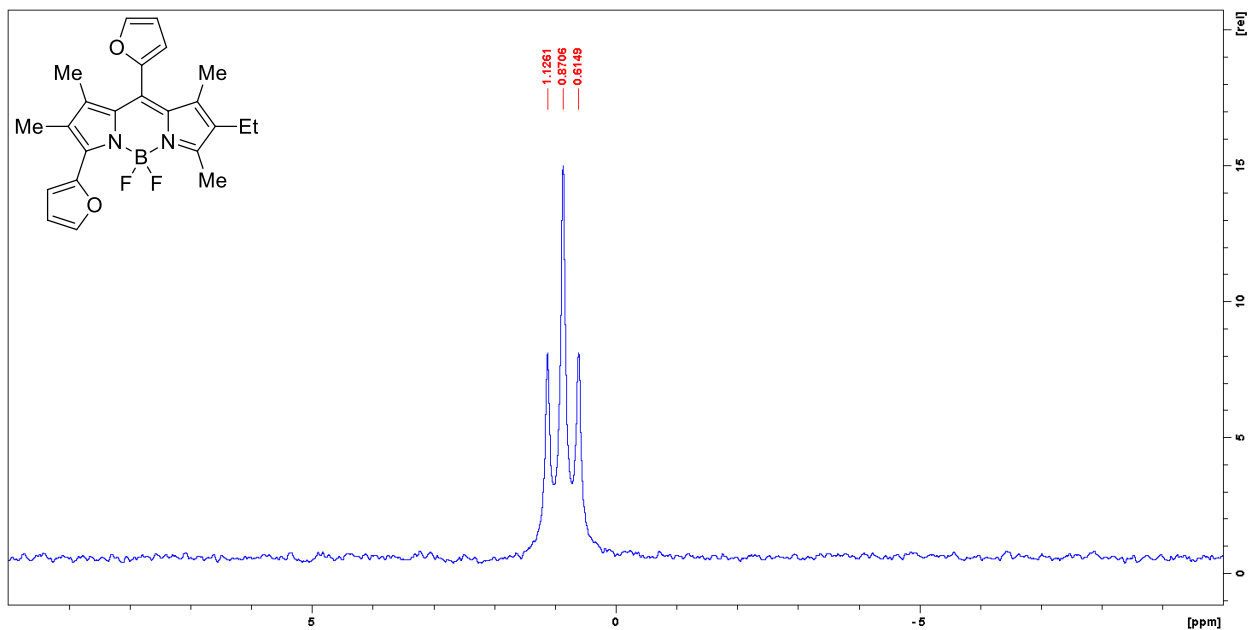

<sup>11</sup>B NMR spectra of BODIPY 6c

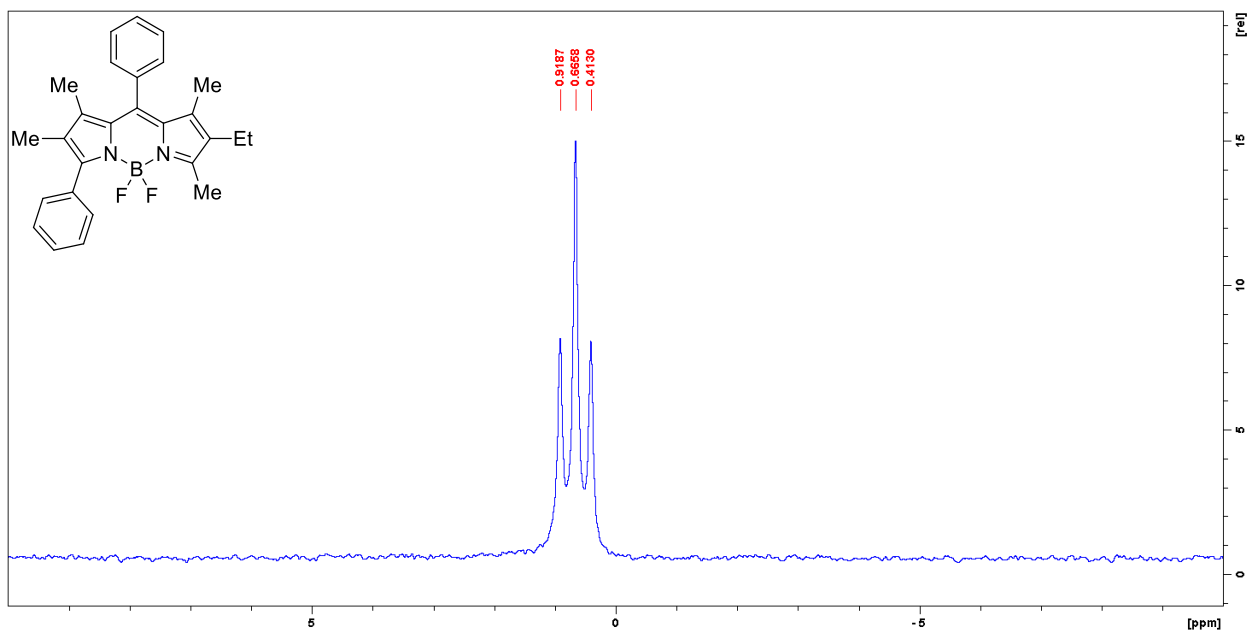

<sup>11</sup>B NMR spectra of BODIPY 7a

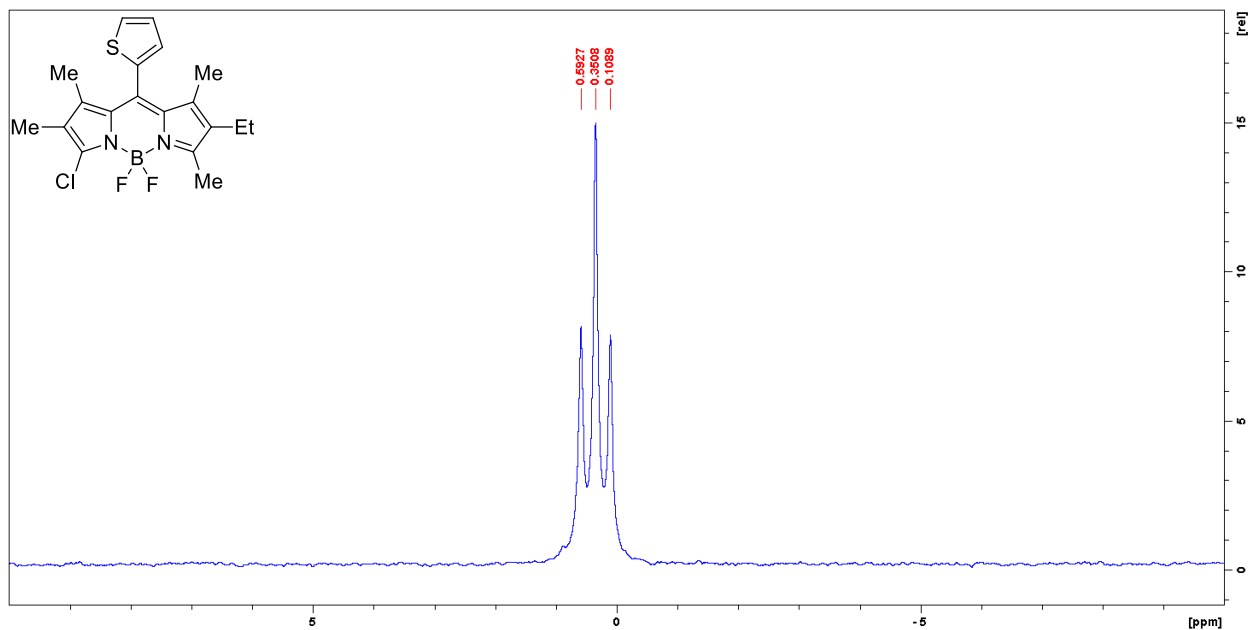

<sup>11</sup>B NMR spectra of BODIPY **7b**

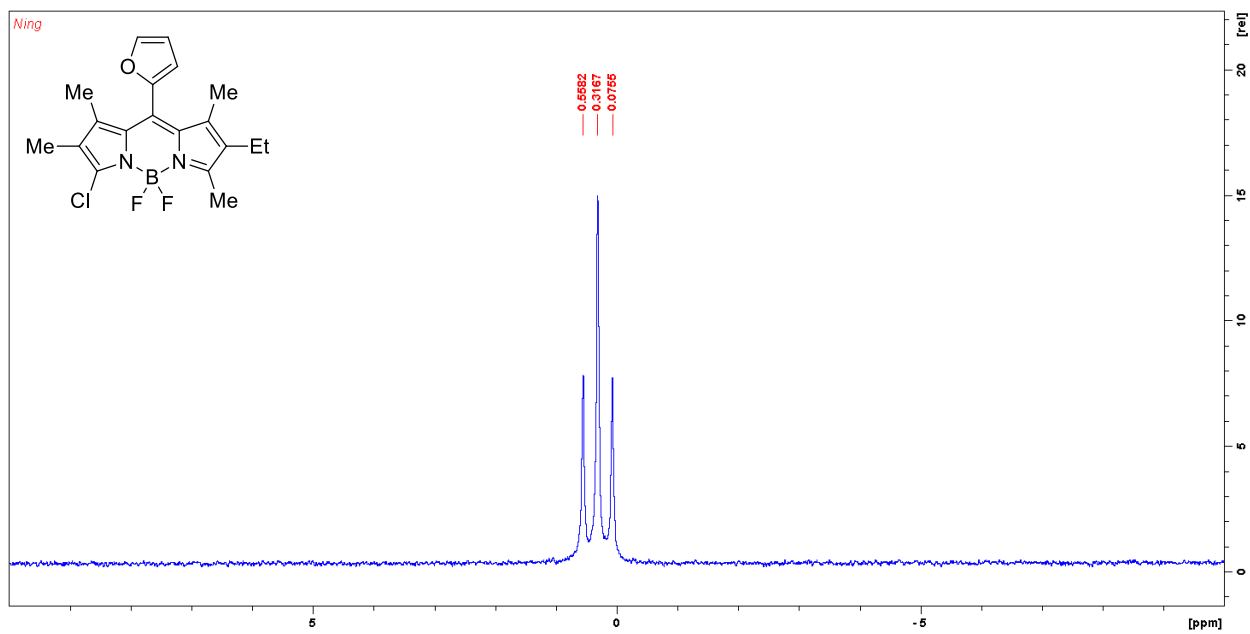

<sup>11</sup>B NMR spectra of BODIPY **7c**

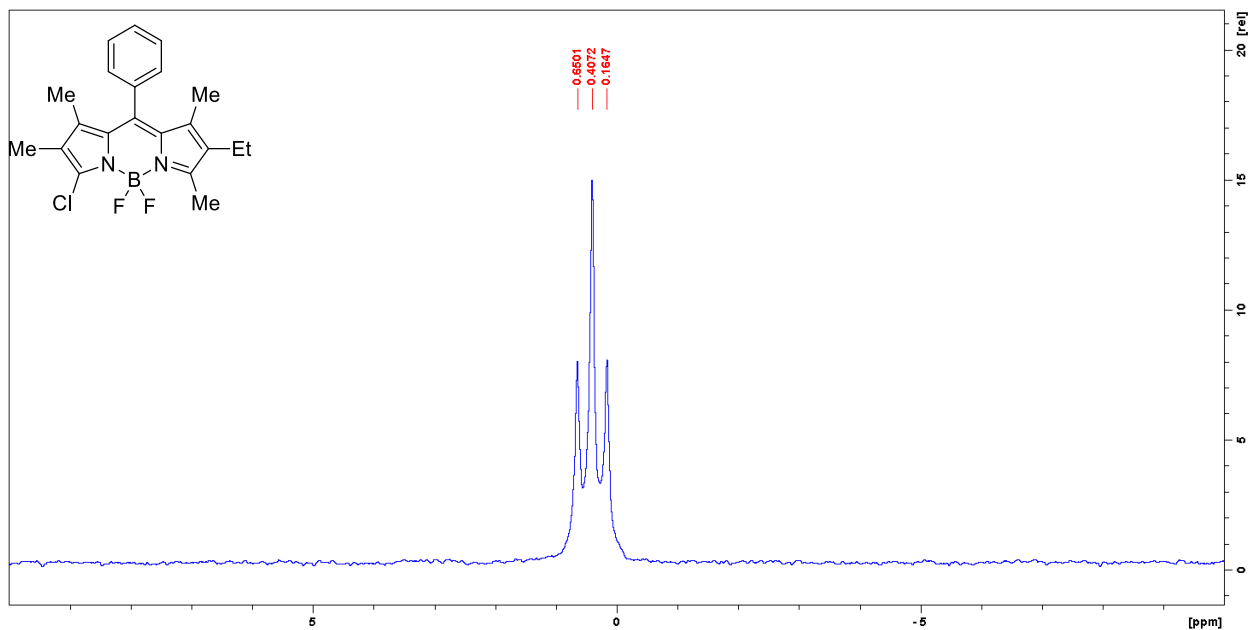

<sup>11</sup>B NMR spectra of BODIPY 8

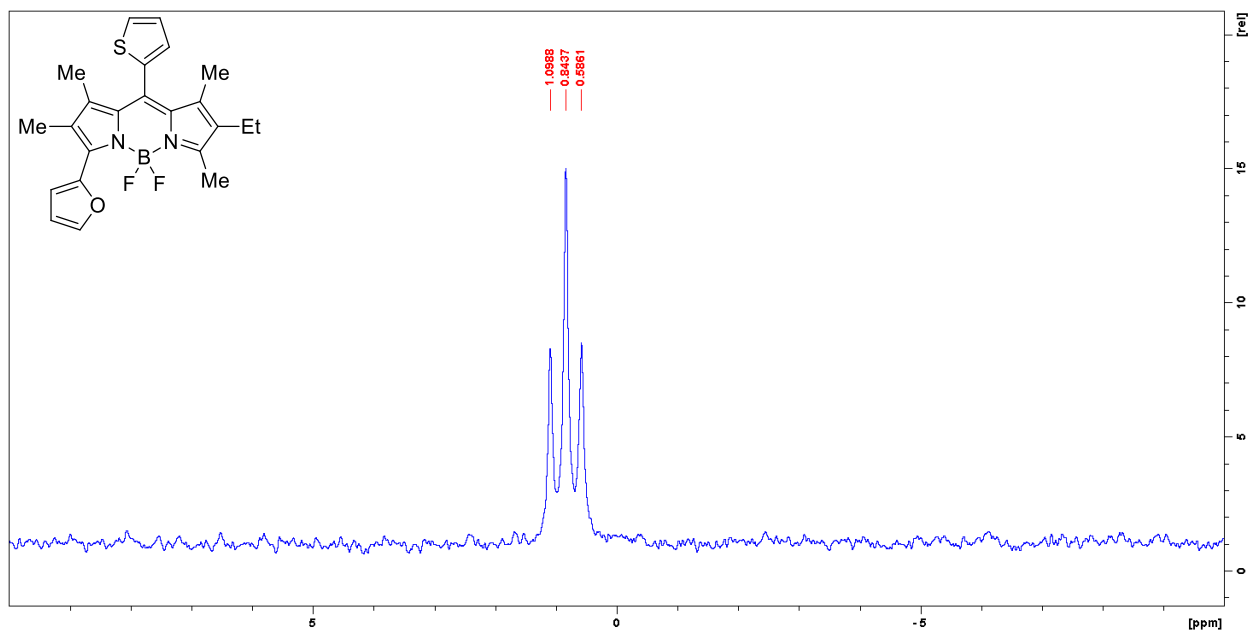

<sup>11</sup>B NMR spectra of BODIPY 9

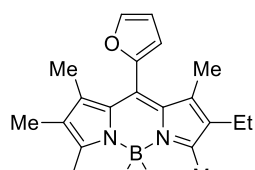

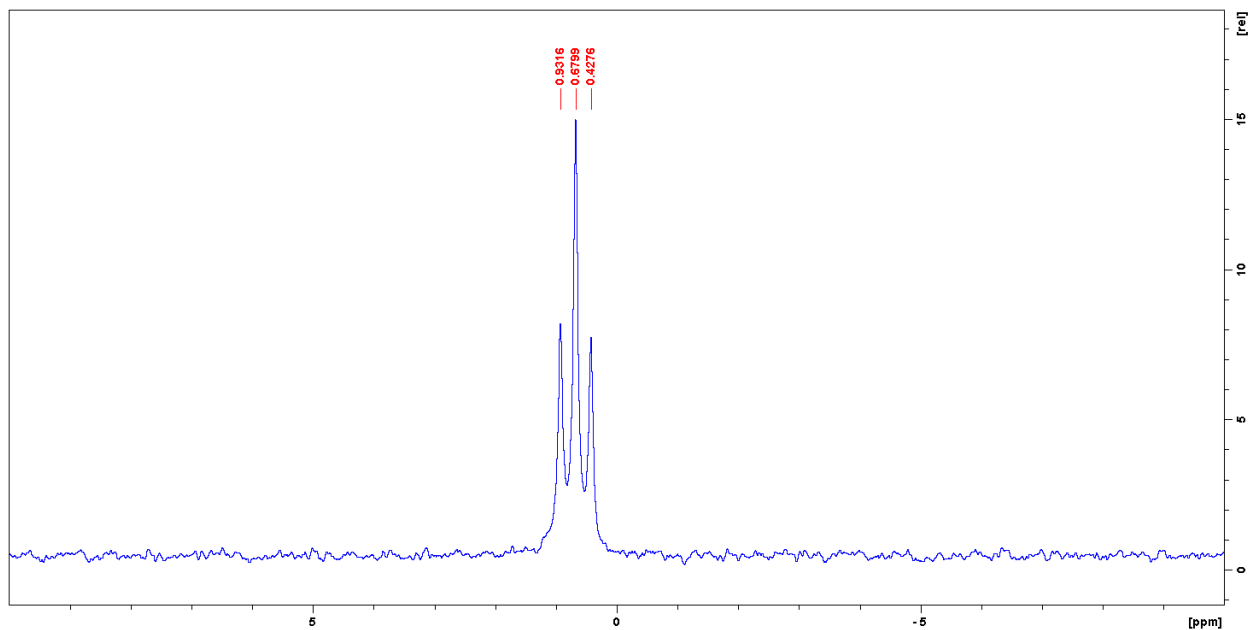

$^{11}\text{B}$  NMR spectra of BODIPY 10

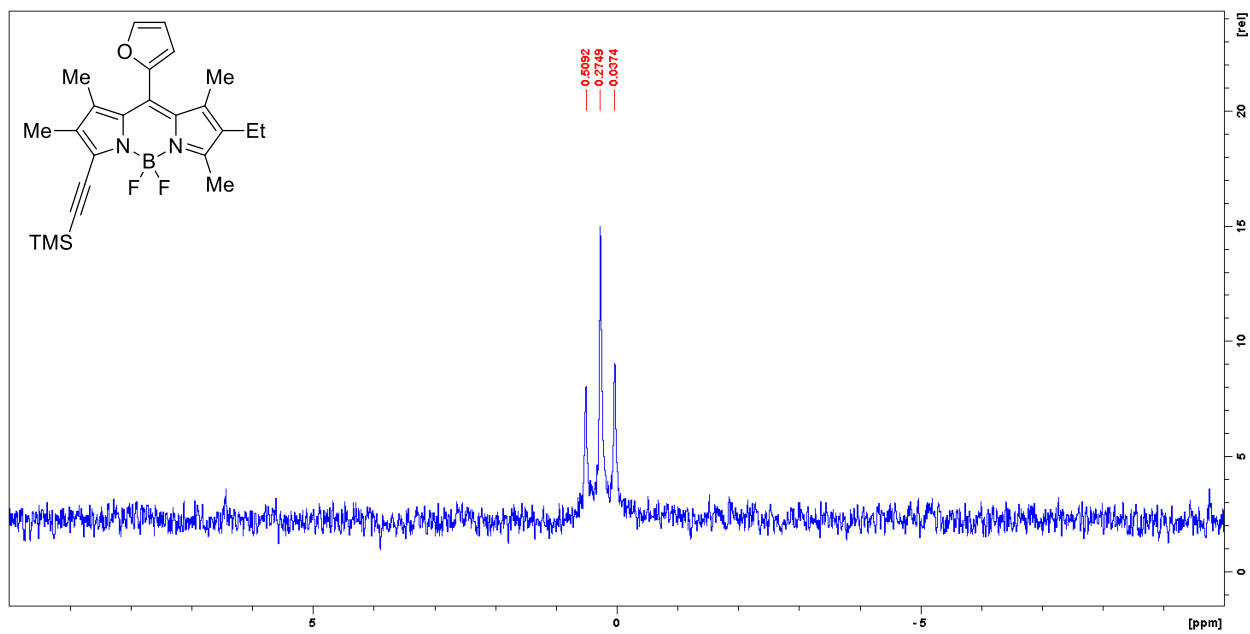

$^{11}\text{B}$  NMR spectra of BODIPY 11



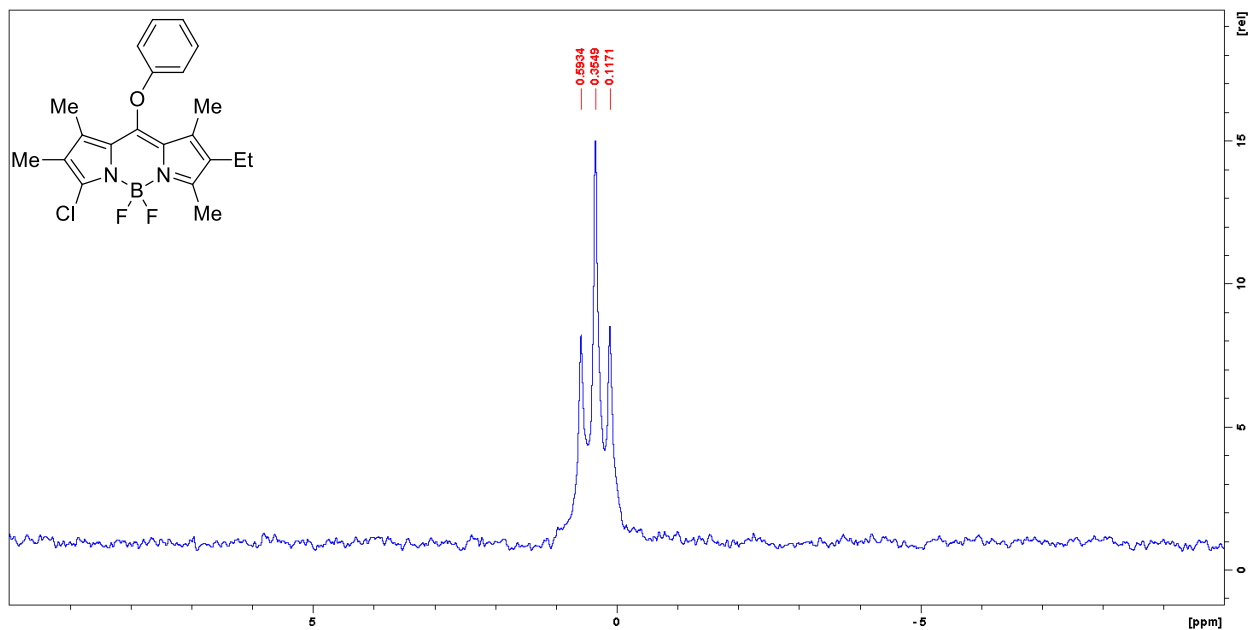

**<sup>11</sup>B NMR spectra of BODIPY 12**

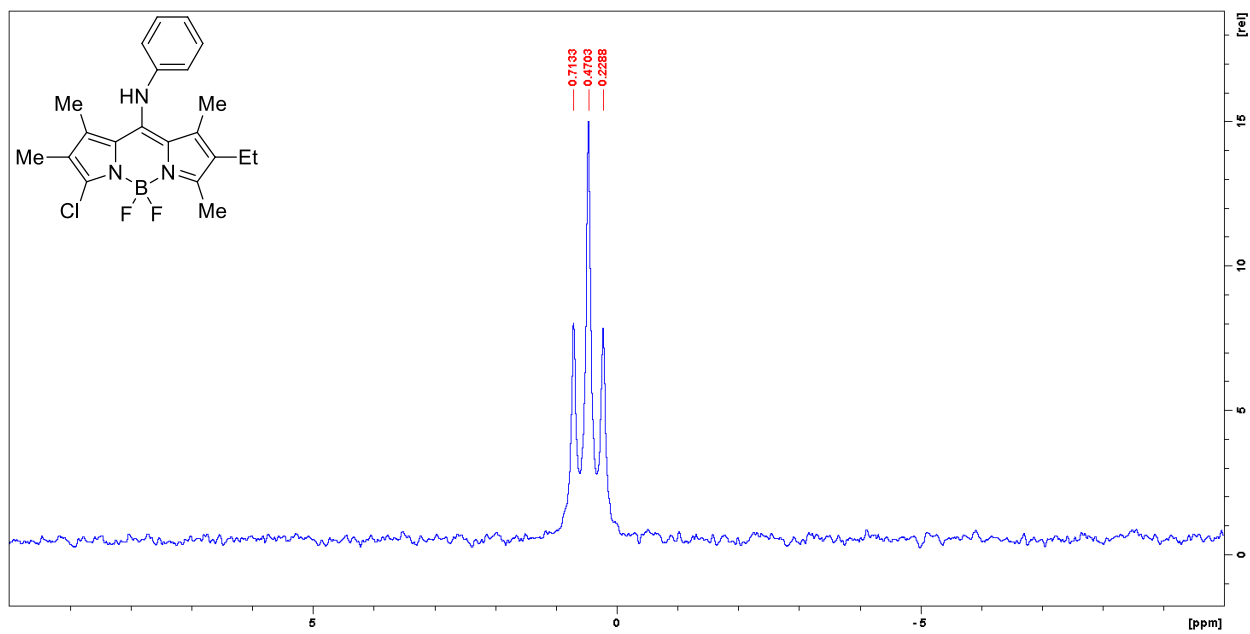

**<sup>11</sup>B NMR spectra of BODIPY 13**

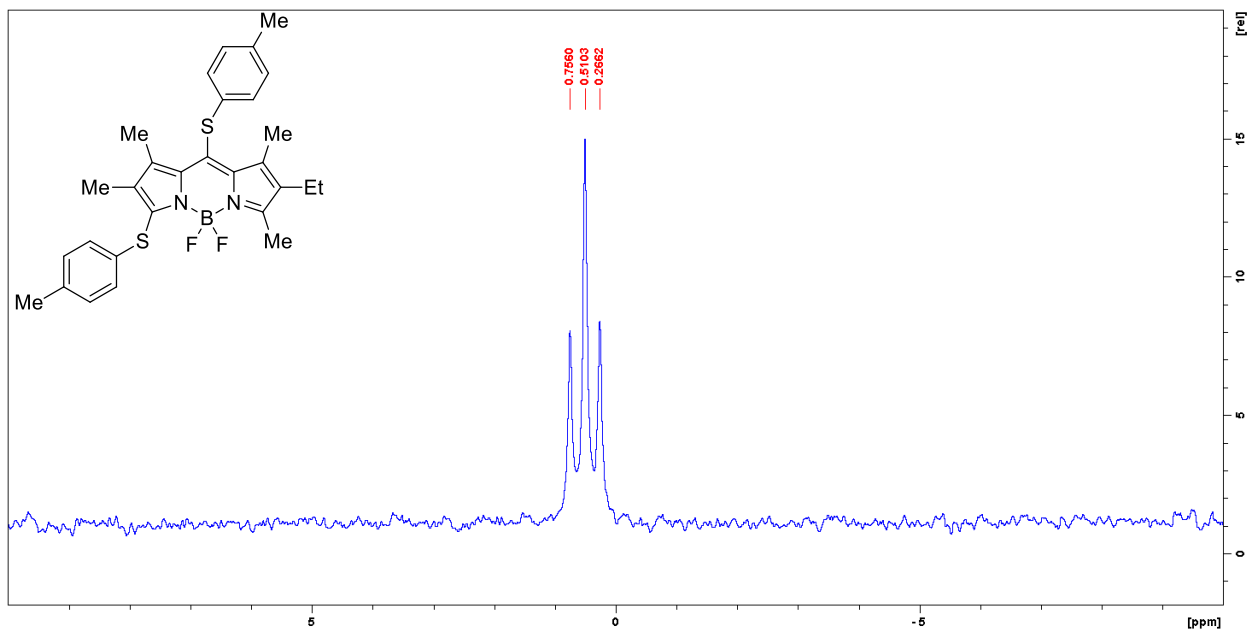

<sup>11</sup>B NMR spectra of BODIPY 14

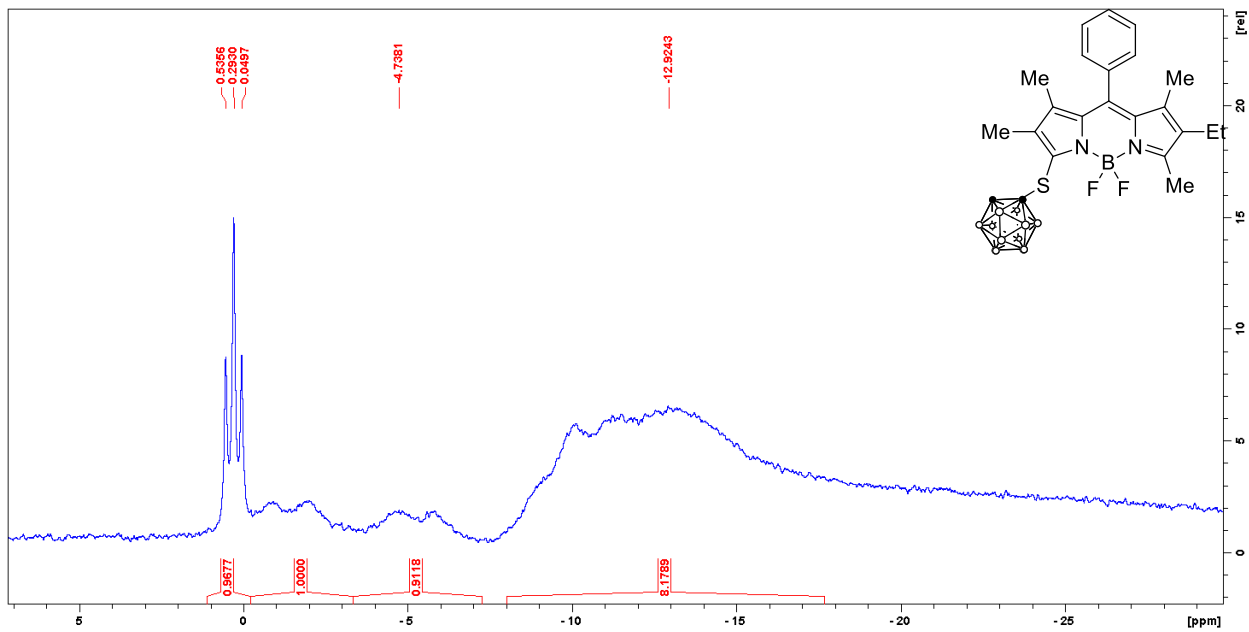

<sup>11</sup>B NMR spectra of BODIPY 15

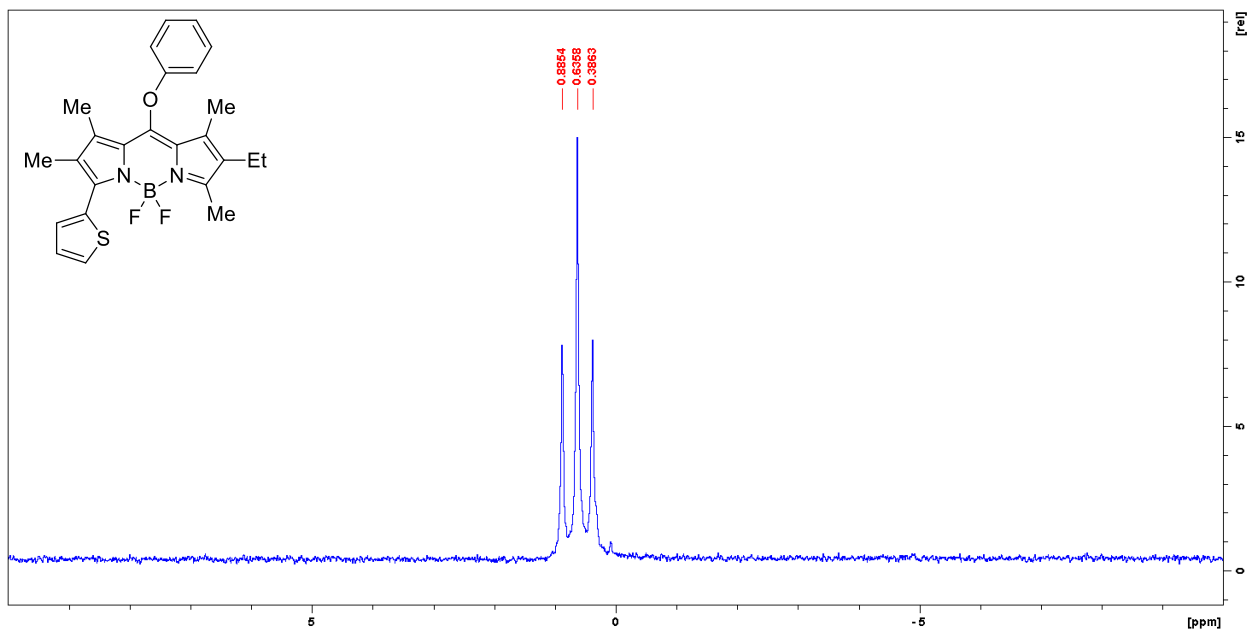

<sup>11</sup>B NMR spectra of BODIPY 16

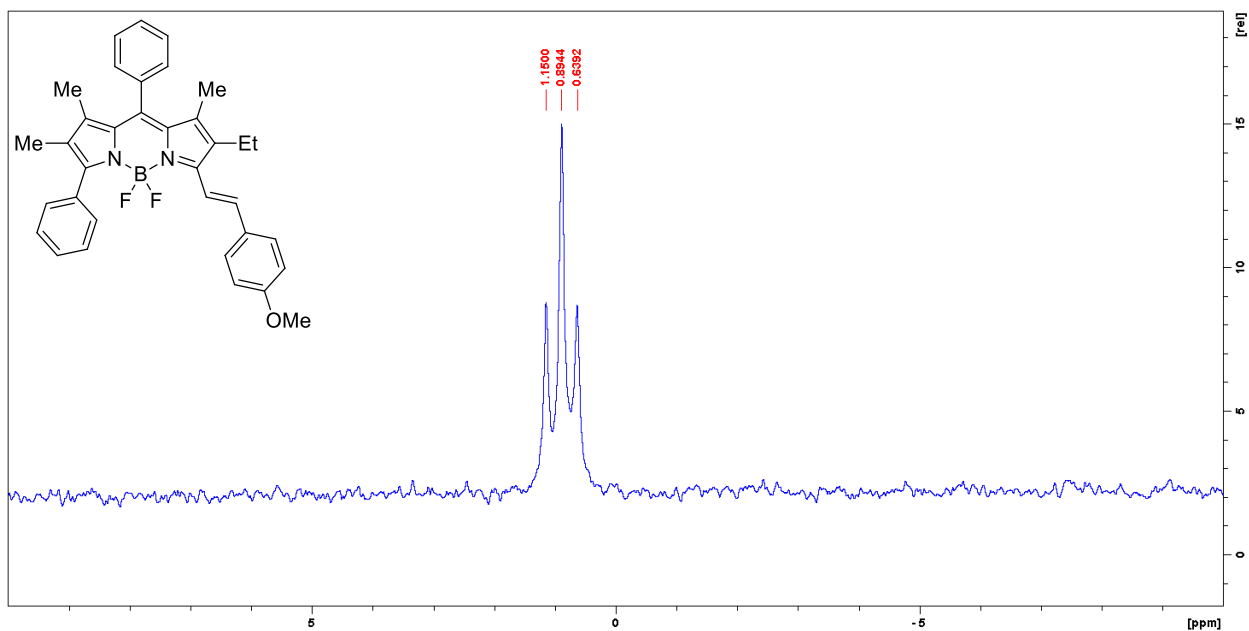

<sup>11</sup>B NMR spectra of BODIPY 17

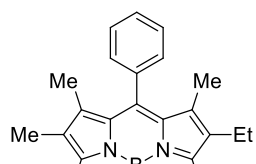

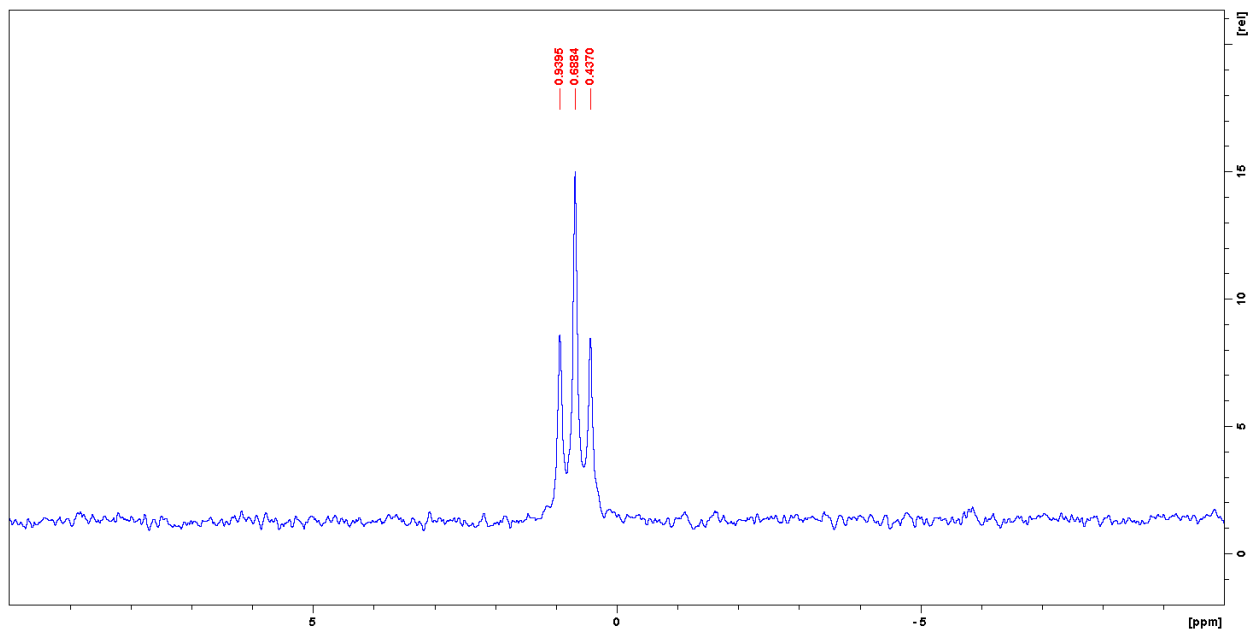

Supplement: NIHMS671959-supplement-Supplementary_DataI.pdf [file NIHMS671959-supplement-Supplementary_DataI.pdf]
